# Supplementary material for: Piscine Orthoreovirus from Western North America Is Transmissible to Atlantic Salmon and Sockeye Salmon but Fails to Cause Heart and Skeletal Muscle Inflammation
Source: PLoS One. 2016 Jan 5;11(1):e0146229. doi: 10.1371/journal.pone.0146229 (PMC4701501; doi:10.1371/journal.pone.0146229)
Supplement: S2 File — (XLSX) [file pone.0146229.s004.xlsx]

## Sheet: Dataset caption
This supportive information file (S2) provides a complete inventory of samples collected and analyzed through a series of experiments as described in the manuscript. Each experiment and its associated dataset is presented as an individual tab. The contents of each tab is as follows: Tab #1. PRV tropism: PRV load in hatchery infected Atlantic salmon collected for viral tissue distribution investig…
KEY:
	Hatched cells indicate that no measurement or sample was taken
	Gray cells indicate that a sample was taken but not analyzed
X	Where and "X" is present in a cell, it marks that the sample underwent histological examination

## Sheet: 1. PRV tropism 
Supportive information file S2: Summary of PRV+ hatchery infected Atlantic salmon collected for viral tissue distribution investigations or for generation of a PRV+ inoculum used in injection challenge of naïve Atlantic salmon (Tissue distribution data displayed in Figure 1) .
Fish ID	Sample use	Sampling date	Weight (g)	Head Kidney Ct 1	Head Kidney Ct 2	Average Ct	Viral load (copies µg RNA-1)	Blood Ct 1	Blood Ct 2	Average Ct	Viral load (copies µg RNA-1)	Spleen Ct 1	Spleen Ct 2	Average Ct	Viral load (copies µg RNA-1)	Gill Ct 1	Gill Ct 2	Average Ct	Viral load (copies µg RNA-1)	Heart Ct 1	Heart Ct 2	Average Ct	Viral load (copies µg RNA-1)	Brain Ct 1	Brain Ct 2	Average Ct	Viral load (copies µg RNA-1)	Liver Ct 1	Liver Ct 2	Average Ct	Viral load (copies µg RNA-1)	Intestine Ct 1	Intestine Ct 2	Average Ct	Viral load (copies µg RNA-1)	Pyloric Cecae Ct 1	Pyloric Cecae Ct 2	Average Ct	Viral load (copies µg RNA-1)	Skeletal muscle Ct 1	Skeletal muscle Ct 2	Average Ct	Viral load (copies µg RNA-1)	Eye Ct 1	Eye Ct 2	Average Ct	Viral load (copies µg RNA-1)
21	Atlantic salmon PRV tissue distribution study	2014-01-24		12.38	12.41	12.395	1.43273e+07	8.56	8.51	8.535	2.28758e+07	10.7	10.79	10.745	5.32078e+06	12.65	12.77	12.71	1.45476e+06	14.42	14.48	14.45	461420	15.46	15.58	15.52	227734	17.75	17.82	17.785	51081.4	19.33	19.21	19.27	19171.3	23.58	23.6	23.59	1107.92	19.5	19.67	19.585	15572.9
22				21.93	22.19	22.06	24328.1	12.73	12.76	12.745	1.42155e+06	18.39	18.48	18.435	33263.5	19.34	19.28	19.31	18671.9	18.49	18.64	18.565	30528.8	19.23	19.31	19.27	19171.3	20.52	20.53	20.525	8374.52	28.68	27.64	28.16	54.2896	24.33	24.48	24.405	647.032	23.61	23.52	23.565	1126.35
23				21.59	21.43	21.51	34973.8	14.5	15.55	15.025	315717	10	9.98	9.99	8.75716e+06	16.86	16.78	16.82	96569.2	25.3	25.3	25.3	358.437	20.22	20.18	20.2	10377.8	28.03	28	28.015	59.7413	19.96	20.31	20.135	10832.7	24	24.22	24.11	786.094	24.27	24.37	24.32	4518.38	18.63	18.56	18.595	341736
24				20.18	20.03	20.105	88394.4	12.78	12.79	12.785	1.38451e+06	10.65	10.67	10.66	5.62778e+06	17.73	18.31	18.02	43743.2	18.01	17.77	17.89	47661.7	19.28	19.3	19.29	18919.9	28.25	28.51	28.38	46.953	20.38	20.38	20.38	9215.48	27.95	27.64	27.795	69.0762	20.19	20.23	20.21	2.67787	15.81	15.88	15.845	74164.4
25				12.61	12.55	12.58	1.26807e+07	9.31	8.95	9.13	1.5447e+07	10.82	10.79	10.805	5.11421e+06	16.18	16.25	16.215	143958	16.27	16.31	16.29	137006	15.55	15.55	15.55	223269	18.21	18.18	18.195	38972.1	21.31	21.27	21.29	5054.82	20.91	20.92	20.915	6474.16	20.94	20.9	20.92	684.364	14.91	14.9	14.905	42.9508
26				16.81	16.82	16.815	775107					13.67	13.58	13.625	795330	17.89	17.86	17.875	48135.8	15.42	15.42	15.42	243270	17.99	18.2	18.095	41630.8	21.54	21.44	21.49	4429.8	21.94	21.77	21.855	3481.55	22.4	22.37	22.385	2453.98	21.42	21.5	21.46	10309.6	17.25	17.19	17.22	29930.3
27				28.47	28.9	28.685	307.141					26.31	26.43	26.37	176.906	28.77	28.69	28.73	37.2693	27.85	27.68	27.765	70.4574	29.82	29.78	29.8	25.9249	30.55	30.54	30.545	11.2502	30.71	30.18	30.445	12.0177	36.36	35.71	36.035	0.300392	33.27	32.17	32.72	6452.83	28.64	28.39	28.515	183772
31	Atlantic salmon contibuting tissue for the PRV+ inoculum used in the injection challenge	2014-01-27	91.8	13.52	13.64	13.58	6.55443e+06
32			71.7	12.17	12.25	12.21	1.61877e+07
35			72	12.19	12.21	12.2	1.62949e+07
37			58	13.15	13.18	13.165	8.61939e+06
38			69.4	14.17	14.22	14.195	4.36789e+06
39			71.2	13.6	13.6	13.6	6.46848e+06
40			76.8	12.55	12.59	12.57	1.27646e+07
45			53.2	14.25	14.17	14.21	4.32486e+06
46			57.4	10.39	10.89	10.64	4.56204e+07
47			70.2	12.77	12.85	12.81	1.08949e+07
49			62.8	12.75	12.83	12.79	1.10396e+07
51			73.8	12.84	12.88	12.86	1.05412e+07
54			72.9	12.69	12.85	12.77	1.11863e+07
55			58.2	11.57	11.65	11.61	2.40519e+07
59			53	14.48	14.53	14.505	3.55978e+06
60			82.1	12.93	12.96	12.945	9.96621e+06
61			69.2	11.48	11.58	11.53	2.53559e+07
62			83.8	12.83	12.83	12.83	1.0752e+07
64			52.2	15.28	15.02	15.15	2.32574e+06
66			76.9	12.94	12.96	12.95	9.93338e+06
67			80.9	13.63	13.57	13.6	6.46848e+06
33	Atlantic salmon screened for PRV but did not contribute towards the PRV+ inoculum	2014-01-27	86.4	14.85	14.85	14.85	2.83494e+06
34			115.6	16.47	16.51	16.49	960525
36			84.3	18.81	18.85	18.83	205045
41			68.5	15.6	15.67	15.635	1.68872e+06
42			46.5	15.18	15.15	15.165	2.30284e+06
43			78	17.35	17.39	17.37	537396
44			85.6	36.54	no CT	no Ct	0
48			104	15.98	16.36	16.17	1.18638e+06
50			117.6	14.93	15.03	14.98	2.60187e+06
52			70.7	15.19	15.32	15.255	2.17004e+06
53			90.8	14.52	14.32	14.42	3.76517e+06
56			95.9	16.79	16.85	16.82	772553
57			58.4	15.22	15.18	15.2	2.25025e+06
58			62.4	15.22	15.18	15.2	2.25025e+06
63			72.1	15.52	15.58	15.55	1.78616e+06
65			69.7	17.33	17.36	17.345	546336
68			68.8	19.15	19.02	19.085	173286
69			72.6	14.92	14.92	14.92	2.70696e+06
70			81.9	24.63	24.64	24.635	4447.29

## Sheet: 2. PRV Injection challenge
Supportive information file S2: Summary of Atlantic salmon sampled at designated timepoint throughout the PRV injection challenge study (data displayed in Figure 2)
Fish ID	Tank	Treatment	Sample timepoint (weeks post challenge)	Sampling date	Weight (g)	Histopathology	Hematocrit (%)	Head Kidney Ct 1	Head Kidney Ct 2	Average Head Kidney Ct	Viral load (copies µg RNA-1)	Blood Ct 1	Blood Ct 2	Ave blood Ct	Viral load (copies µg RNA-1)
PRV1-71	A101	media injected	0	2014-02-06	82.7
PRV1-72					54.8
PRV1-73					63.1
PRV1-74					55.2
PRV1-75					64.8
PRV1-76	A102				99.1
PRV1-77					77.5
PRV1-78					70.6
PRV1-79					45.7
PRV1-80					NA
PRV1-81	A103				67.9
PRV1-82					114.2
PRV1-83					52.7
PRV1-84					84.7
PRV1-85					67.1
PRV1-86	A104	negative tissue injected	0	2014-02-06	75.9
PRV1-87					53.3
PRV1-88					67
PRV1-89					81.3
PRV1-90					112.9
PRV1-91	A105				55
PRV1-92					112.9
PRV1-93					52.9
PRV1-94					58.4
PRV1-95					88.2
PRV1-96	A106				106.5
PRV1-97					54.3
PRV1-98					53.4
PRV1-99					107.3
PRV1-100					35.6
PRV1-101	A108	PRV+ inoculum injected	0	2014-02-07	92.5			20.5	20.6	20.55	65899.9	27.25	27.48	27.365	733.938
PRV1-102					57.7			18.3	18.4	18.35	281462	25.82	25.78	25.8	2061.57
PRV1-103					55.3			18.3	18.2	18.25	300663	28.02	27.98	28	482.685
PRV1-104					102.3			19.7	19.7	19.7	115478	27.98	27.94	27.96	495.596
PRV1-105					70.3			18.4	18.4	18.4	272326	28.03	28.34	28.185	427.21
PRV1-106	A109				70.3			19	19	19	183284	25.2	25.31	25.255	2953.93
PRV1-107					104.4			22.5	22.4	22.45	18807.5	30.81	30.75	30.78	77.072
PRV1-108					67.3			21.3	21.2	21.25	41520.3	24.36	24.32	24.34	5403.12
PRV1-109					68.4			21.6	21.7	21.65	31887.3	26.75	26.79	26.77	1086.9
PRV1-110					73			21.3	21.2	21.25	41520.3	28.86	28.88	28.87	271.842
PRV1-111	A110				79			23.2	24.1	23.65	8519.29	28.39	28.13	28.26	406.58
PRV1-112					69.1			27.4	27.6	27.5	671.378	24.28	24.26	24.27	5658.58
PRV1-113					45.8			28.8	28.9	28.85	275.453	27.2	27.26	27.23	802.326
PRV1-114					105.3			25.3	25.3	25.3	2867.49	28.91	29.01	28.96	256.166
PRV1-115					64.6			27	27.2	27.1	874.198	26.74	26.61	26.675	1157.23
PRV1-116	A101	media injected	1	2014-02-11	58.2
PRV1-117					135.6
PRV1-118					60.1
PRV1-119					94.4
PRV1-120					81.3
PRV1-121	A102				41.2
PRV1-122					61.2
PRV1-123					88.6
PRV1-124					58.8
PRV1-125					70.2
PRV1-126	A103				69.2
PRV1-127					62.5
PRV1-128					56.1
PRV1-129					68.7
PRV1-130					63.6
PRV1-131	A104	negative tissue injected	1	2014-02-11	83.2
PRV1-132					52
PRV1-133					60.5
PRV1-134					125.3
PRV1-135					68.7
PRV1-136	A105				61.1
PRV1-137					66.7
PRV1-138					60.5
PRV1-139					85.1
PRV1-140					63.8
PRV1-141	A106				83.1
PRV1-142					77.7
PRV1-143					71.4
PRV1-144					84.6
PRV1-145					81.5
PRV1-146	A108	PRV+ inoculum injected	1	2014-02-12	88.6			21	21	21	48967.9	19.71	19.89	19.8	108104
PRV1-147					91.7			21.2	21.2	21.2	42913.2	19.9	19.9	19.9	101200
PRV1-148					78.3			23.4	23.3	23.35	10384.5	19.96	20.2	20.08	89864.9
PRV1-149					81.4			22.5	22.5	22.5	18197.1	21.27	21.37	21.32	39645.8
PRV1-150					118.9			24	24.2	24.1	6330.39	20.72	20.83	20.775	56806.5
PRV1-151	A109				106.9			20.4	20.6	20.5	68110.7	21.2	21.24	21.22	42350.5
PRV1-152					56.2			19.9	19.9	19.9	101200	20.2	20.36	20.28	78753.3
PRV1-153					51.7			21.8	22.2	22	25310.7	21.32	21.45	21.385	37981.2
PRV1-154					72.9			21.2	21.3	21.25	41520.3	19.14	19.2	19.17	163833
PRV1-155					67			21.4	21.3	21.35	38868.6	19.28	19.42	19.35	145483
PRV1-156	A110				88.9			22	22.3	22.15	22925.2	21.43	21.48	21.455	36266.5
PRV1-157					43.5			20	20.2	20.1	88686.6	21.44	21.48	21.46	36147
PRV1-158					92.9			21.7	21.9	21.8	28881.9	21.3	21.51	21.405	37483.1
PRV1-159					60.1			25	25.2	25.1	3272.08	21.64	21.53	21.585	33284.9
PRV1-160					101.1			no Ct	no Ct	no Ct	0	22.2	22.28	22.24	21603.3
PRV1-161	A101	media injected	2	2014-02-18	65.6			no Ct	no Ct	no Ct	0
PRV1-162					76.6			no Ct	no Ct	no Ct	0
PRV1-163					68.1			no Ct	no Ct	no Ct	0
PRV1-164					48.6			no Ct	no Ct	no Ct	0
PRV1-165					44.3			no Ct	no Ct	no Ct	0
PRV1-166	A102				53.6			no Ct	no Ct	no Ct	0
PRV1-167					65.5			no Ct	no Ct	no Ct	0
PRV1-168					67.3			no Ct	no Ct	no Ct	0
PRV1-169					84.1			no Ct	no Ct	no Ct	0
PRV1-170					50			no Ct	no Ct	no Ct	0
PRV1-171	A103				64.5			no Ct	no Ct	no Ct	0
PRV1-172					75.5			no Ct	no Ct	no Ct	0
PRV1-173					60.7			no Ct	no Ct	no Ct	0
PRV1-174					43.5			no Ct	no Ct	no Ct	0
PRV1-175					90.7			no Ct	no Ct	no Ct	0
PRV1-176	A104	negative tissue injected	2	2014-02-18	47.8			no Ct	no Ct	no Ct	0
PRV1-177					81			no Ct	no Ct	no Ct	0
PRV1-178					68.6			no Ct	no Ct	no Ct	0
PRV1-179					83.7			no Ct	no Ct	no Ct	0
PRV1-180					80.2			no Ct	no Ct	no Ct	0
PRV1-181	A105				95.2			no Ct	no Ct	no Ct	0
PRV1-182					106.2			no Ct	no Ct	no Ct	0
PRV1-183					78.5			no Ct	no Ct	no Ct	0
PRV1-184					57			no Ct	no Ct	no Ct	0
PRV1-185					60.2			no Ct	no Ct	no Ct	0
PRV1-186	A106				60.7			no Ct	no Ct	no Ct	0
PRV1-187					71.1			no Ct	no Ct	no Ct	0
PRV1-188					78.9			no Ct	no Ct	no Ct	0
PRV1-189					70.5			no Ct	no Ct	no Ct	0
PRV1-190					48.1			no Ct	no Ct	no Ct	0
PRV1-191	A108	PRV+ inoculum injected	2	2014-02-19	109.2			19.99	20.18	20.085	89568.9	19	18.91	18.955	188809
PRV1-192					83.1			22.89	22.86	22.875	14207.7	18.87	18.79	18.83	205045
PRV1-193					52.4			18.78	18.81	18.795	209836	18.29	18.39	18.34	283326
PRV1-194					52.3			22.4	22.44	22.42	19183.6	16.58	16.6	16.59	899183
PRV1-195					54.4			20.43	20.62	20.525	66996.2	17.28	17.3	17.29	566530
PRV1-196	A109				107.8			21.39	21.43	21.41	37359.7	17.78	17.81	17.795	405963
PRV1-197					70.9			20.32	20.29	20.305	77464.7	16.79	16.76	16.775	795840
PRV1-198					64			19.85	19.89	19.87	103223	17.19	17.03	17.11	637988
PRV1-199					93.8			21.16	21.34	21.25	41520.3	17.5	17.45	17.475	501419
PRV1-200					53.9			17.82	17.91	17.865	387636	17.16	17.01	17.085	648601
PRV1-201	A110				56.4			24.72	24.74	24.73	4177.04	16.52	16.5	16.51	947931
PRV1-202					42.4			21.89	21.85	21.87	27578.1	16.96	16.95	16.955	706702
PRV1-203					72.9			22.73	22.76	22.745	15480.4	18.8	18.81	18.805	208456
PRV1-204					80			23.83	23.89	23.86	7416.79	18.83	18.8	18.815	207085
PRV1-205					41.5			22.77	22.85	22.81	14830.4	16.98	16.94	16.96	704374
PRV1-206	A101	media injected	4	2014-03-04	49.4
PRV1-207					80.8
PRV1-208					45.9
PRV1-209					73.3
PRV1-210					51.7
PRV1-211	A102				55.2
PRV1-212					71.6
PRV1-213					69.9
PRV1-214					44.9
PRV1-215					67.4
PRV1-216	A103				45.7
PRV1-217					91.1
PRV1-218					66
PRV1-219					56.3
PRV1-220					63.1
PRV1-221	A104	negative tissue injected	4	2014-03-04	57.8							no CT	no CT	no Ct	0
PRV1-222					68.2							no CT	no CT	no Ct	0
PRV1-223					50.5							no CT	no CT	no Ct	0
PRV1-224					61.2							no CT	no CT	no Ct	0
PRV1-225					103.8							no CT	no CT	no Ct	0
PRV1-226	A105				68							no CT	no CT	no Ct	0
PRV1-227					75.3							no CT	no CT	no Ct	0
PRV1-228					86.1							no CT	no CT	no Ct	0
PRV1-229					98.4							no CT	no CT	no Ct	0
PRV1-230					50.9							no CT	no CT	no Ct	0
PRV1-231	A106				71.3							no CT	no CT	no Ct	0
PRV1-232					60.4							no CT	no CT	no Ct	0
PRV1-233					51.3							no CT	no CT	no Ct	0
PRV1-234					42.8							no CT	no CT	no Ct	0
PRV1-235					71.8							no CT	no CT	no Ct	0
PRV1-236	A108	PRV+ inoculum injected	4	2014-03-05	87.5			no Ct	no Ct	no Ct	0	23.92	23.91	23.915	7152.42
PRV1-237					69.6			no Ct	no Ct	no Ct	0	21.2	21.77	21.485	35555.6
PRV1-238					78.6			no Ct	no Ct	no Ct	0	23.047	23.26	23.1535	11822.4
PRV1-239					44.1			19.25	19.32	19.285	151860	22.17	22.18	22.175	22550.1
PRV1-240					167.1			18.69	18.6	18.645	231671	16.32	16.39	16.355	1.05003e+06
PRV1-241	A109				86.4			20.54	20.52	20.53	66775.5	22.02	22.23	22.125	23306.6
PRV1-242					120.3			25.34	25.54	25.44	2614.43	22	22.23	22.115	23460.9
PRV1-243					72			19.68	19.62	19.65	119352	23.16	23	23.08	12409.9
PRV1-244					54.6			23.41	23.45	23.43	9850.47	22.45	22.63	22.54	17723
PRV1-245					69.2			26.21	25.93	26.07	1725.1	19.91	20.01	19.96	97270.9
PRV1-246	A110				69			35.73	no Ct	no Ct	0	21.8	21.79	21.795	28977.4
PRV1-247					64.2			25.61	25.71	25.66	2261.12	20.67	20.43	20.55	65899.9
PRV1-248					62.6			19.99	20.19	20.09	89273.8	20.91	20.85	20.88	53003.5
PRV1-249					73.9			19.18	19.24	19.21	159565	22.89	22.88	22.885	14114.3
PRV1-250					174.1			20.18	20.23	20.205	82749.3	18.29	18.31	18.3	290904
PRV1-251	A101	media injected	6	2014-03-18	51.2	X
PRV1-252					59.2	X
PRV1-253					63.9
PRV1-254					44.7
PRV1-255					51.1
PRV1-256	A102				62.8	X
PRV1-257					77.4	X
PRV1-258					53.7
PRV1-259					91.1
PRV1-260					57.4
PRV1-261	A103				72.5
PRV1-262					106.9	X
PRV1-263					77.2	X
PRV1-264					58.3
PRV1-265					108
PRV1-266	A104	negative tissue injected	6	2014-03-18	72.5
PRV1-267					100.9	X						no Ct	no Ct	no Ct	0
PRV1-268					41.9	X						no Ct	no Ct	no Ct	0
PRV1-269					81.7							no Ct	no Ct	no Ct	0
PRV1-270					57.2							no Ct	no Ct	no Ct	0
PRV1-271	A105				55.1	X						no Ct	no Ct	no Ct	0
PRV1-272					96.3							no Ct	no Ct	no Ct	0
PRV1-273					72.9	X						no Ct	no Ct	no Ct	0
PRV1-274					88.4							no Ct	no Ct	no Ct	0
PRV1-275					79.2							no Ct	no Ct	no Ct	0
PRV1-276	A106				99.3							no Ct	no Ct	no Ct	0
PRV1-277					74.5	X						no Ct	no Ct	no Ct	0
PRV1-278					81.6	X						no Ct	no Ct	no Ct	0
PRV1-279					70.5							no Ct	no Ct	no Ct	0
PRV1-280					103							no Ct	no Ct	no Ct	0
PRV1-281	A108	PRV+ inoculum injected	6	2014-03-19	84.9			21.24	21.25	21.245	41657.5	21.86	21.84	21.85	27944.5
PRV1-282					91.6	X		24.38	24.32	24.35	5367.58	20.36	20.19	20.275	79013.6
PRV1-283					45.2			24.68	24.75	24.715	4218.59	24.78	24.51	24.645	4418.04
PRV1-284					59.7			26.66	26.7	26.68	1153.41	19.81	19.91	19.86	103907
PRV1-285					51.8			25.91	25.91	25.91	1917.22	24.34	24.44	24.39	5227.75
PRV1-286	A109				63.7	X		23.4	23.36	23.38	10180.9	20.99	21.17	21.08	46449.7
PRV1-287					54.4			25.16	25.18	25.17	3124.36	23.95	23.91	23.93	7081.96
PRV1-288					55.6	X		24.4	24.41	24.405	5176.25	22.87	22.77	22.82	14732.9
PRV1-289					35			25.91	25.91	25.91	1917.22	24.89	24.87	24.88	3783.36
PRV1-290					69.1	X		23.8	23.81	23.805	7690.94	22.81	22.69	22.75	15429.4
PRV1-291	A110				45.5			26.69	26.8	26.745	1104.98	25.87	25.81	25.84	2007.87
PRV1-292					38.7			27.97	27.91	27.94	502.181	23.93	23.9	23.915	7152.42
PRV1-293					100.4			25.62	25.74	25.68	2231.47	24.94	24.99	24.965	3576.97
PRV1-294					64.5	X		23.74	23.74	23.74	8028.03	24.91	24.81	24.86	3833.62
PRV1-295					45.2			26.3	26.34	26.32	1462.73	23.64	23.45	23.545	9130.56
PRV1-296	B4	media injected	12	2014-04-30	71.1	X
PRV1-297					72.7
PRV1-298					67.8
PRV1-299					50.6
PRV1-300					56.2	X
PRV1-301					82	X
PRV1-302					87.5
PRV1-303					66
PRV1-304					58.7
PRV1-305					69.9	X
PRV1-306					50.7
PRV1-307					74.4
PRV1-308					88.1	X
PRV1-309					60.5
PRV1-310					70.8
PRV1-311	B5	negative tissue injected	12	2014-04-30	58	X		no Ct	no Ct	no Ct	0
PRV1-312					58			no Ct	no Ct	no Ct	0
PRV1-313					76			no Ct	no Ct	no Ct	0
PRV1-314					57.9			no Ct	no Ct	no Ct	0
PRV1-315					69.5			no Ct	no Ct	no Ct	0
PRV1-316					97.8	X		no Ct	no Ct	no Ct	0
PRV1-317					65	X		no Ct	no Ct	no Ct	0
PRV1-318					76.8			no Ct	no Ct	no Ct	0
PRV1-319					70.6			no Ct	no Ct	no Ct	0
PRV1-320					43.9	X		no Ct	no Ct	no Ct	0
PRV1-321					88.8			no Ct	no Ct	no Ct	0
PRV1-322					49.8			no Ct	no Ct	no Ct	0
PRV1-323					36.8			no Ct	no Ct	no Ct	0
PRV1-324					88.4	X		no Ct	no Ct	no Ct	0
PRV1-325					75.1			no Ct	no Ct	no Ct	0
PRV1-326	B6	PRV+ inoculum injected	12	2014-05-01	66.7	X		32.5	31.18	31.84	38.2907	25.15	25.03	25.09	3293.74
PRV1-327					60.8			28.8	28.7	28.75	294.245	24.47	24.41	24.44	5058.06
PRV1-328					62.7			26.88	26.82	26.85	1031.01	21.81	21.55	21.68	31262.2
PRV1-329					57.6			28.02	28.33	28.175	430.039	22.27	22.29	22.28	21040.4
PRV1-330					88.4			29.95	30.72	30.335	103.38	20.96	20.99	20.975	49782.5
PRV1-331					58.9	X		30.8	31.33	31.065	63.8578	21.67	21.57	21.62	32524.9
PRV1-332					51.7			29.72	29.75	29.735	153.603	23.28	23.22	23.25	11092.9
PRV1-333					69.5			29.41	29.23	29.32	201.996	22.78	22.54	22.66	16373.6
PRV1-334					66.9			31.63	32.34	31.985	34.7965	24.6	24.47	24.535	4750.69
PRV1-335					59.1			31.49	30.75	31.12	61.5815	24.71	24.74	24.725	4190.84
PRV1-336					51.5			29.25	29.28	29.265	209.462	23.34	23.33	23.335	10487.8
PRV1-337					81.5	X		32.17	30.97	31.57	45.7591	23.89	23.92	23.905	7199.77
PRV1-338					77.1	X		26.3	26.31	26.305	1477.28	21.51	21.67	21.59	33175.2
PRV1-339					66	X		28.51	28.56	28.535	339.101	21.5	21.51	21.505	35089.4
PRV1-340					53.4			29.41	29.64	29.525	176.436	21.93	21.96	21.945	26246.3
PRV1-341	B4	media injected	24	2014-07-22	92.1	X	45					no Ct	no Ct	no Ct	0
PRV1-342					68.1	X	44					no Ct	no Ct	no Ct	0
PRV1-343					88.7	X	50					no Ct	no Ct	no Ct	0
PRV1-344					127.8	X	51					no Ct	no Ct	no Ct	0
PRV1-345					111.6	X	44					no Ct	no Ct	no Ct	0
PRV1-346					94.9	X	53					no Ct	no Ct	no Ct	0
PRV1-347					86.1	X	46					no Ct	no Ct	no Ct	0
PRV1-348					87.4	X	43					no Ct	no Ct	no Ct	0
PRV1-349					102.3	X	55					no Ct	no Ct	no Ct	0
PRV1-350					99.4	X	50					no Ct	no Ct	no Ct	0
PRV1-351					73.3		50					no Ct	no Ct	no Ct	0
PRV1-352					89.9		50					no Ct	no Ct	no Ct	0
PRV1-353					104.7		48					no Ct	no Ct	no Ct	0
PRV1-354					66.1		53					no Ct	no Ct	no Ct	0
PRV1-355					158.5		50					no Ct	no Ct	no Ct	0
PRV1-356	B5	negative tissue injected	24	2014-07-22	106	X	48	no Ct	no Ct	no Ct	0	no Ct	no Ct	no Ct	0
PRV1-357					120.4	X	56	no Ct	no Ct	no Ct	0	no Ct	no Ct	no Ct	0
PRV1-358					114	X	51	no Ct	no Ct	no Ct	0	no Ct	no Ct	no Ct	0
PRV1-359					71.8	X	48	no Ct	no Ct	no Ct	0	no Ct	no Ct	no Ct	0
PRV1-360					132.8	X	45	no Ct	no Ct	no Ct	0	no Ct	no Ct	no Ct	0
PRV1-361					77.4	X	47	no Ct	no Ct	no Ct	0	no Ct	no Ct	no Ct	0
PRV1-362					117.2	X	54	no Ct	no Ct	no Ct	0	no Ct	no Ct	no Ct	0
PRV1-363					82.8	X	45	no Ct	no Ct	no Ct	0	no Ct	no Ct	no Ct	0
PRV1-364					73.1	X		no Ct	no Ct	no Ct	0	no Ct	no Ct	no Ct	0
PRV1-365					88.9	X	41	no Ct	no Ct	no Ct	0	no Ct	no Ct	no Ct	0
PRV1-366					102		49	no Ct	no Ct	no Ct	0	no Ct	no Ct	no Ct	0
PRV1-367					114.1		46	no Ct	no Ct	no Ct	0	no Ct	no Ct	no Ct	0
PRV1-368					97.2			no Ct	no Ct	no Ct	0	no Ct	no Ct	no Ct	0
PRV1-369					110.1		43	no Ct	no Ct	no Ct	0	no Ct	no Ct	no Ct	0
PRV1-370					104.9		51	no Ct	no Ct	no Ct	0	no Ct	no Ct	no Ct	0
PRV1-371	B6	PRV+ inoculum injected	24	2014-07-23	81.8	X	54	30.13	30.17	30.15	116.804	22.38	22.38	22.38	19696.7
PRV1-372					92.5	X	51	29.87	29.57	29.72	155.131	26.72	26.82	26.77	1086.9
PRV1-373					114.3	X	49	30.48	30.93	30.705	80.9827	15.37	15.39	15.38	1.99822e+06
PRV1-374					103	X	55	26.95	27.28	27.115	865.587	16.53	16.55	16.54	929348
PRV1-375					83.4	X	48	32.78	32.7	32.74	21.1421	24.62	24.75	24.685	4302.94
PRV1-376					160	X	47	29.16	29.44	29.3	204.68	14.29	14.33	14.31	4.04866e+06
PRV1-377					114.4	X	49	30	30.18	30.09	121.522	22.24	22.21	22.225	21818.2
PRV1-378					96.6	X	57	31.55	31.48	31.515	47.4505	18.28	18.27	18.275	295744
PRV1-379					89.3	X	41	32.2	32.32	32.26	29.0214	16.89	16.93	16.91	728004
PRV1-380					84.1	X	48	31.63	31.65	31.64	43.6933	19.85	19.87	19.86	103907
PRV1-381					85.4		46	32.35	32.49	32.42	26.1133	24.8	24.93	24.865	3820.99
PRV1-382					90.8		48	30.46	30.18	30.32	104.408	20.61	20.83	20.72	58906.3
PRV1-383					77.1		53	32.88	33.33	33.105	16.6164	25.23	25.31	25.27	2924.83
PRV1-384					97		44	31.64	31.59	31.615	44.4201	18.77	18.62	18.695	224151
PRV1-385					80.8		39	33.79	32.26	33.025	17.5172	27.22	27.19	27.205	815.673

## Sheet: 3. Primary Cohab
Supportive information file S2: Summary of Atlantic and Sockeye salmon sampled during the first of three successive Piscine Reovirus cohabitation challenges (data displayed in Figure 3)
Fish ID	Salmon Species	Tank	Treatment	Sample timepoint (weeks post cohab)	Sampling date	Weight (g)	Histopathology	Hematocrit (%)	Head Kidney Ct 1	Head Kidney Ct 2	Ave Head Kidney Ct	Viral load (copies µg RNA-1)	Blood Ct 1	Blood Ct 2	Ave Blood Ct	Viral load (copies µg RNA-1)
PRV2-1	Atlantic	B1	sentinel	1	2014-02-19	104.3			no Ct	no Ct	no Ct	0
PRV2-2						101.4			no Ct	no Ct	no Ct	0
PRV2-3						67			no Ct	no Ct	no Ct	0
PRV2-4						111.6			no Ct	no Ct	no Ct	0
PRV2-5						93.9			no Ct	no Ct	no Ct	0
PRV2-6	Atlantic	B1	PRV donor	1	2014-02-19	57.9			18.72	18.79	18.755	215449	14.44	14.5	14.47	3.64296e+06
PRV2-7						72.1			21.92	21.93	21.925	26595	19.53	19.7	19.615	122141
PRV2-8						66.7			23.95	23.97	23.96	6943.13	21	21.13	21.065	46911.8
PRV2-9						144.6			26.8	26.91	26.855	1027.61	18.83	18.88	18.855	201690
PRV2-10						114.4			25.73	25.7	25.715	2180.52	11.64	11.66	11.65	2.34253e+07
PRV2-11	Sockeye	B2	sentinel	1	2014-02-20	174.9			no Ct	no Ct	no Ct	0
PRV2-12						116.1			no Ct	no Ct	no Ct	0
PRV2-13						135.4			no Ct	no Ct	no Ct	0
PRV2-14						156.7			no Ct	no Ct	no Ct	0
PRV2-15						166.9			no Ct	no Ct	no Ct	0
PRV2-16	Atlantic	B2	sentinel	1	2014-02-20	89.5			no Ct	no Ct	no Ct	0
PRV2-17						68			no Ct	no Ct	no Ct	0
PRV2-18						88.3			no Ct	no Ct	no Ct	0
PRV2-19						54.1			no Ct	no Ct	no Ct	0
PRV2-20						57			no Ct	no Ct	no Ct	0
PRV2-21	Atlantic	B2	PRV donor	1	2014-02-20	116.8			27.9	28.3	28.1	451.859	22.23	22.02	22.125	23306.6
PRV2-22						66.5			21.8	21.83	21.815	28597.4	17.48	17.47	17.475	501419
PRV2-23						67.5			24.55	24.47	24.51	4829.72	9.66	9.61	9.635	8.85521e+07
PRV2-24						53.5			22.39	22.45	22.42	19183.6	20.69	20.7	20.695	59886.2
PRV2-25						81.7			26.73	26.64	26.685	1149.61	19.26	19.24	19.25	155408
PRV2-26	Sockeye	B3	sentinel	1	2014-02-20	103.7			no Ct	no Ct	no Ct	0
PRV2-27						120.4			no Ct	no Ct	no Ct	0
PRV2-28						148.1			no Ct	no Ct	no Ct	0
PRV2-29						187.3			no Ct	no Ct	no Ct	0
PRV2-30						126.7			no Ct	no Ct	no Ct	0
PRV2-31	Atlantic	B3	sentinel	1	2014-02-20	65.1			no Ct	no Ct	no Ct	0
PRV2-32						80			no Ct	no Ct	no Ct	0
PRV2-33						77.6			no Ct	no Ct	no Ct	0
PRV2-34						56			no Ct	no Ct	no Ct	0
PRV2-35						57.6			no Ct	no Ct	no Ct	0
PRV2-36	Atlantic	B3	PRV donor	1	2014-02-20	52							19.49	19.58	19.535	128763
PRV2-37						75.8			23.19	23.2	23.195	11503	12.92	12.86	12.89	1.03346e+07
PRV2-38						90.6			26.18	26.27	26.225	1557.37	10.44	10.53	10.485	5.05339e+07
PRV2-39						63.7			21.69	21.66	21.675	31365.5	19.18	19.15	19.165	164375
PRV2-40						67.3			33.65	33.46	33.555	12.347	28.69	28.28	28.485	350.477
PRV2-41	Atlantic	B1	sentinel	2	2014-02-26	97.5			no Ct	no Ct	no Ct	0	no Ct	no Ct	no Ct	0
PRV2-42						140.2			no Ct	no Ct	no Ct	0	no Ct	no Ct	no Ct	0
PRV2-43						81.7			no Ct	no Ct	no Ct	0	no Ct	no Ct	no Ct	0
PRV2-44						93			no Ct	no Ct	no Ct	0	no Ct	no Ct	no Ct	0
PRV2-45						69.5			no Ct	no Ct	no Ct	0	no Ct	no Ct	no Ct	0
PRV2-46	Atlantic	B1	PRV donor	2	2014-02-26	70.8			19.82	20.25	20.035	92573.7	19.29	19.68	19.485	133083
PRV2-47						66.8			27.69	27.88	27.785	556.268	22.8	22.9	22.85	14444.1
PRV2-48						47.8			24.3	24.46	24.38	5262.36	12.25	12.54	12.395	1.43273e+07
PRV2-49						60.6			22.4	22.68	22.54	17723	13.36	13.56	13.46	7.09459e+06
PRV2-50						12.31			26.31	26.41	26.36	1424.62	19.91	20.15	20.03	92879.6
PRV2-51	Sockeye	B2	sentinel	2	2014-02-27	197.4			no Ct	no Ct	no Ct	0	no Ct	no Ct	no Ct	0
PRV2-52						142.1			no Ct	no Ct	no Ct	0	no Ct	no Ct	no Ct	0
PRV2-53						75.2			no Ct	no Ct	no Ct	0	no Ct	no Ct	no Ct	0
PRV2-54						126.1			no Ct	no Ct	no Ct	0	no Ct	no Ct	no Ct	0
PRV2-55						140.3			no Ct	no Ct	no Ct	0	no Ct	no Ct	no Ct	0
PRV2-56	Atlantic	B2	sentinel	2	2014-02-27	83.7			no Ct	no Ct	no Ct	0	35.16	no CT	no Ct	0
PRV2-57						43.5			no Ct	no Ct	no Ct	0	34.6	no CT	no Ct	0
PRV2-58						63			no Ct	no Ct	no Ct	0	36.28	no CT	no Ct	0
PRV2-59						58.8			no Ct	no Ct	no Ct	0	no Ct	no Ct	no Ct	0
PRV2-60						47.8			no Ct	no Ct	no Ct	0	no Ct	no Ct	no Ct	0
PRV2-61	Atlantic	B2	PRV donor	2	2014-02-27	64.4			24.45	24.33	24.39	5227.75	15.9	15.93	15.915	1.40381e+06
PRV2-62						76.2			19.48	19.81	19.645	119747	11.68	11.65	11.665	2.31946e+07
PRV2-63						64.5			20.48	20.31	20.395	72997.7	11.38	11.31	11.345	2.86484e+07
PRV2-64						61.2			20.74	20.72	20.73	58518.8	11.47	11.51	11.49	2.60341e+07
PRV2-65						48.3			no Ct	36.73	no Ct	0	30.96	32.24	31.6	44.862
PRV2-66	Sockeye	B3	sentinel	2	2014-02-27	206.1			no Ct	no Ct	no Ct	0	36.19	no CT	no Ct	0
PRV2-67						254.8	X		no Ct	no Ct	no Ct	0	no Ct	no Ct	no Ct	0
PRV2-68						179.3	X		no Ct	no Ct	no Ct	0	no Ct	no Ct	no Ct	0
PRV2-69						147.1	X		no Ct	no Ct	no Ct	0	no Ct	no Ct	no Ct	0
PRV2-70						147.7			no Ct	no Ct	no Ct	0	no Ct	no Ct	no Ct	0
PRV2-71	Atlantic	B3	sentinel	2	2014-02-27	74.6			no Ct	no Ct	no Ct	0	no Ct	no Ct	no Ct	0
PRV2-72						54.6			no Ct	no Ct	no Ct	0	no Ct	no Ct	no Ct	0
PRV2-73						54			no Ct	no Ct	no Ct	0	no Ct	no Ct	no Ct	0
PRV2-74						47.5			no Ct	no Ct	no Ct	0	no Ct	no Ct	no Ct	0
PRV2-75						69.1			no Ct	no Ct	no Ct	0	no Ct	no Ct	no Ct	0
PRV2-76	Atlantic	B3	PRV donor	2	2014-02-27	72.8			21.54	22.13	21.835	28222.5	15.42	15.02	15.22	2.22075e+06
PRV2-77						89.1			24.98	25.23	25.105	3261.3	11.47	11.47	11.47	2.638e+07
PRV2-78						67.2			22.24	22.28	22.26	21320	10.7	10.48	10.59	4.71508e+07
PRV2-79						78.8			27.53	27.68	27.605	626.431	20.35	20.82	20.585	64395.2
PRV2-80						91.1			19.97	20.24	20.105	88394.4	10.53	10.21	10.37	5.45184e+07
PRV2-81	Atlantic	B1	sentinel	4	2014-03-12	93.4			27.49	27.48	27.485	678.057	33.73	34.56	34.145	8.36497
PRV2-82						63.8			35.85	35.82	35.835	2.7422	25.39	25.46	25.425	2640.44
PRV2-83						134.1			33.25	33.46	33.355	14.0891	30.32	30.31	30.315	104.754
PRV2-84						89.8			30.18	30.23	30.205	112.641	26.71	26.82	26.765	1090.49
PRV2-85						125			29.54	29.85	29.695	157.712	27.1	27.17	27.135	854.238
PRV2-86	Atlantic	B1	PRV donor	4	2014-03-12	107.6			28.21	28.29	28.25	409.272	13.65	13.92	13.785	5.72506e+06
PRV2-87						58.1			22.77	22.7	22.735	15582.9	14.46	14.51	14.485	3.60708e+06
PRV2-88						48			20.95	20.95	20.95	50610.7	14.9	14.93	14.915	2.7159e+06
PRV2-89						72.8			21.75	21.81	21.78	29265.7	16.46	16.61	16.535	932420
PRV2-90						52.5			22.29	22.32	22.305	20696.2	14.2	14.24	14.22	4.29642e+06
PRV2-91	Sockeye	B2	sentinel	4	2014-03-13	155.8			no Ct	36.3	no Ct	0	34.9	36.2	35.55	3.30965
PRV2-92						119.9			31.72	31.4	31.56	46.0621	27.87	27.95	27.91	512.222
PRV2-93						209.9			no Ct	no Ct	no Ct	0	no Ct	no Ct	no Ct	0
PRV2-94						153.5			no Ct	35.86	no Ct	0	33.17	32.62	32.895	19.0864
PRV2-95						197.4			no Ct	no Ct	no Ct	0	no Ct	no Ct	no Ct	0
PRV2-96	Atlantic	B2	sentinel	4	2014-03-13	54.8			27.75	27.51	27.63	616.181	26.37	26.56	26.465	1329.25
PRV2-97						54.6			30.48	30.28	30.38	100.355	28.76	28.86	28.81	282.821
PRV2-98						57.7			21.99	21.88	21.935	26420.1	20.14	20.02	20.08	89864.9
PRV2-99						51.5			no Ct	34.8	no Ct	0	35.15	34.85	35	4.7579
PRV2-100						49.5			23.98	24.03	24.005	6739.97	23.76	23.85	23.805	7690.94
PRV2-101	Atlantic	B2	PRV donor	4	2014-03-13	95.6			23.8	23.99	23.895	7247.45	14.29	14.41	14.35	3.94319e+06
PRV2-102						49.7			23.79	23.87	23.83	7565.09	21.96	22.16	22.06	24328.1
PRV2-103						82.9			23.68	23.54	23.61	8747.18	19.82	19.84	19.83	105984
PRV2-104						56.9			23.26	23.25	23.255	11056.4	21.21	20.97	21.09	46144.2
PRV2-105						98.1			25.78	25.74	25.76	2116.72	12.56	12.53	12.545	1.2977e+07
PRV2-106	Sockeye	B3	sentinel	4	2014-03-13	127.2	X		no Ct	no Ct	no Ct	0	no Ct	no Ct	no Ct	0
PRV2-107						172			no Ct	no Ct	no Ct	0	no Ct	no Ct	no Ct	0
PRV2-108						179.1			no Ct	no Ct	no Ct	0	no Ct	no Ct	no Ct	0
PRV2-109						208.1			36.17	no Ct	no Ct	0	34.42	no Ct	no Ct	0
PRV2-110						154.4			36.28	34.29	35.285	3.94215	30.86	30.7	30.78	77.072
PRV2-111	Atlantic	B3	sentinel	4	2014-03-13	71.3			32.97	32.28	32.625	22.809	27.76	27.93	27.845	534.672
PRV2-112						104.7			31.3	31.9	31.6	44.862	25.34	25.39	25.365	2747.09
PRV2-113						66.7			28.2	27.97	28.085	456.354	25.24	25.4	25.32	2829.89
PRV2-114						53.9			30.79	31.2	30.995	66.8769	24.18	24	24.09	6372.31
PRV2-115						106.8			30.83	31.63	31.23	57.2695	27.78	27.71	27.745	571.148
PRV2-116	Atlantic	B3	PRV donor	4	2014-03-13	72.8			19.37	19.32	19.345	145964	14.6	15.42	15.01	2.55086e+06
PRV2-117						42.4			24.16	24.16	24.16	6084.63	9.6	9.69	9.645	8.79696e+07
PRV2-118						58.4			27.42	27.31	27.365	733.938	14.39	14.53	14.46	3.66708e+06
PRV2-119						58.9			22.26	22.18	22.22	21890.3	18.41	18.41	18.41	270535
PRV2-120						106.3			24.83	24.85	24.84	3884.56	21.5	21.9	21.7	30852.3
PRV2-121	Atlantic	B1	sentinel	6	2014-03-26	61.2			20.36	20.6	20.48	69015.6	9.29	9.33	9.31	1.09735e+08
PRV2-122						59.4			23.98	24	23.99	6807.02	16.31	16.14	16.225	1.14409e+06
PRV2-123						68.3			23.31	23.37	23.34	10453.3	12.19	12.29	12.24	1.58704e+07
PRV2-124						35.4			19.81	19.85	19.83	105984	15.42	15.61	15.515	1.82789e+06
PRV2-125						69.2			26.16	27.17	26.665	1164.89	15.68	15.97	15.825	1.48971e+06
PRV2-126	Atlantic	B1	PRV donor	6	2014-03-26	58.3			26.59	26.46	26.525	1277.64	23.5	23.3	23.4	10047.4
PRV2-127						78.4			27.55	27.5	27.525	660.392	13.3	13.35	13.325	7.75567e+06
PRV2-128						67.4			28.56	28.49	28.525	341.346	11.61	11.62	11.615	2.39727e+07
PRV2-129						120.6			26.57	26.46	26.515	1286.1	10.65	10.84	10.745	4.25662e+07
PRV2-130						85.6			27.31	27.29	27.3	766.105	14.42	10.84	12.63	3.72809e+06
PRV2-131	Sockeye	B2	sentinel	6	2014-03-27	113.5			22.31	22.4	22.355	20024.4	19.32	19.26	19.29	151359
PRV2-132						167.9			25.24	25.28	25.26	2944.19	21.78	21.74	21.76	29654.5
PRV2-133						64.9	X		no Ct	no Ct	no Ct	0	35.96	34.29	35.125	4.38117
PRV2-134						157.4			34.36	32.6	33.48	12.9735	27.45	27.36	27.405	714.817
PRV2-135						190.2			25.02	25.16	25.09	3293.74	21.8	21.84	21.82	28503.2
PRV2-136	Atlantic	B2	sentinel	6	2014-03-27	64.1			19.25	19.29	19.27	153370	16.44	16.54	16.49	960525
PRV2-137						47.3			17.43	17.39	17.41	523396	16.85	16.85	16.85	757409
PRV2-138						64.8			20.83	20.96	20.895	52481.4	15.92	15.92	15.92	1.39918e+06
PRV2-139						66.1			20.88	20.75	20.815	55326.6	17.32	17.3	17.31	559102
PRV2-140						119.5			31.01	31.33	31.17	59.5827	26.7	26.51	26.605	1211.94
PRV2-141	Atlantic	B2	PRV donor	6	2014-03-27	81.2			23.66	23.43	23.545	9130.56	18.55	18.55	18.55	246660
PRV2-142						67			26.17	26.18	26.175	1609.61	20.49	20.59	20.54	66336.3
PRV2-143						69.8			29.31	29.26	29.285	206.716	25.98	26.23	26.105	1685.71
PRV2-144						58.6			25.28	25.34	25.31	2848.63	21.91	21.91	21.91	26859.6
PRV2-145						103.5			27.4	27.46	27.43	703.12	22.62	22.78	22.7	15947
PRV2-146	Sockeye	B3	sentinel	6	2014-03-27	154.5	X		no Ct	no Ct	no Ct	0	36	no Ct	no Ct	0
PRV2-147						147			30.34	30.34	30.34	103.039	28.84	28.81	28.825	280.036
PRV2-148						75.2			30.28	30.3	30.29	106.496	26.48	26.54	26.51	1290.35
PRV2-149						113.7			24.45	24.52	24.485	4910.06	19.85	19.84	19.845	104940
PRV2-150						183.8			22.91	23.11	23.01	12996.7	19.14	18.99	19.065	175589
PRV2-151	Atlantic	B3	sentinel	6	2014-03-27	57.9			14.28	14.28	14.28	4.12962e+06	9.63	9.53	9.58	9.18253e+07
PRV2-152						98.3			16.6	16.75	16.675	850132	11.82	12.16	11.99	1.87171e+07
PRV2-153						75.6			29.35	29.38	29.365	196.085	24	23.98	23.99	6807.02
PRV2-154						43.7			no Ct	36.18	no Ct	0	31.34	31.49	31.415	50.6876
PRV2-155						74.2			13.21	13.19	13.2	8.42258e+06	17.45	17.38	17.415	521672
PRV2-156	Atlantic	B3	PRV donor	6	2014-03-27	42.9			25.9	25.79	25.845	2001.25	24.48	24.46	24.47	4958.91
PRV2-157						80.8			29.43	29.36	29.395	192.242	23.39	23.42	23.405	10014.3
PRV2-158						71.8			25.72	25.45	25.585	2375.85	22.82	22.8	22.81	14830.4
PRV2-159						55.7			24.88	24.93	24.905	3721.45	16.9	16.88	16.89	737677
PRV2-160						68.5			25.4	25.26	25.33	2811.28	21.91	21.91	21.91	26859.6
PRV2-161	Atlantic	B1	sentinel	12	2014-05-07	74.8			28.23	28.65	28.44	361.041	19.96	20.18	20.07	90459.9
PRV2-162						63.3			22.82	22.86	22.84	14539.7	20.51	20.81	20.66	61285.6
PRV2-163						82.9			27.26	27.38	27.32	756.06	23.87	24.12	23.995	6784.6
PRV2-164						70.7			23.67	23.69	23.68	8352.29	19.19	19.26	19.225	157993
PRV2-165						60.7			25.34	25.36	25.35	2774.42	23.15	23.17	23.16	11771.7
PRV2-166	Atlantic	B1	PRV donor	12	2014-05-07	54.5			26.18	26.21	26.195	1588.51	22.14	21.97	22.055	24408.5
PRV2-167						116.1			25.75	25.79	25.77	2102.8	22.7	22.78	22.74	15531.6
PRV2-168						110.5			28.19	28.24	28.215	418.835	22.94	23.15	23.045	12699.9
PRV2-169						113.5			26.9	27.11	27.005	930.76	20.26	20.34	20.3	77720.7
PRV2-170						108.6			27.23	27.27	27.25	791.806	21.86	21.85	21.855	27852.4
PRV2-171	Sockeye	B2	sentinel	12	2014-05-08	152	X		23.9	23.95	23.925	7105.37	18.17	18.24	18.205	309726
PRV2-172						182.8			26.89	26.82	26.855	1027.61	30.16	30.2	30.18	114.515
PRV2-173						171.8	X		21.89	21.88	21.885	27306.4	21.9	21.93	21.915	26771.1
PRV2-174						247			25.98	26	25.99	1818.63	24.8	24.88	24.84	3884.56
PRV2-175						234.1	X		23.99	24.21	24.1	6330.39	20.87	21.01	20.94	50945.8
PRV2-176	Atlantic	B2	sentinel	12	2014-05-08	51.9	X		22.98	23.12	23.05	12658.1	22.18	22.22	22.2	22181.1
PRV2-177						66.6			24.81	24.95	24.88	3783.36	15.39	15.36	15.375	2.00482e+06
PRV2-178						70.9	X		21.86	21.96	21.91	26859.6	22.69	22.68	22.685	16105.7
PRV2-179						54.7			23.01	22.9	22.955	13477.1	25.26	25.22	25.24	2983.31
PRV2-180						88.8	X		23.68	23.63	23.655	8491.23	20.42	20.29	20.355	74950.3
PRV2-181	Atlantic	B2	PRV donor	12	2014-05-08	64.8			30.96	30.73	30.845	73.8358	23.84	23.66	23.75	7975.22
PRV2-182						70.3	X		27.86	27.81	27.835	538.213	20.81	20.83	20.82	55144.4
PRV2-183						99.9	X		27.29	26.89	27.09	879.987	25.62	25.67	25.645	2283.62
PRV2-184						109.9			26.44	26.39	26.415	1373.84	20.76	20.75	20.755	57561.3
PRV2-185						106.5	X		28.5	28.38	28.44	361.041	20.41	20.45	20.43	71330.9
PRV2-186	Sox	B3	sentinel	12	2014-05-08	85	X		19.45	19.39	19.42	138915	13.92	13.99	13.955	5.11749e+06
PRV2-187						172.7			23.37	23.45	23.41	9981.35	22.72	22.73	22.725	15686.1
PRV2-188						195.5			24.59	24.71	24.65	4403.49	19.8	19.48	19.64	120143
PRV2-189						169.5	X		25.16	25.28	25.22	3022.95	22.65	22.7	22.675	16212.3
PRV2-190						103.9	X		21.18	21.2	21.19	43197.3	30.76	30.84	30.8	76.0614
PRV2-191	Atlantic	B3	sentinel	12	2014-05-08	90.8	X		23.7	23.89	23.795	7741.87	21.21	21.26	21.235	41933.3
PRV2-192						63.6			22.71	22.87	22.79	15027.5	23.01	22.96	22.985	13212.9
PRV2-193						65.6	X		16.58	16.79	16.685	844540	20.83	20.76	20.795	56061.7
PRV2-194						80.2	X		26.89	26.97	26.93	977.987	22.25	22.2	22.225	21818.2
PRV2-195						71.4			23.33	23.33	23.33	10522.5	18.84	18.81	18.825	205722
PRV2-196	Atlantic	B3	PRV donor	12	2014-05-08	84.5			29.21	28.78	28.995	250.317	23.43	23.27	23.35	10384.5
PRV2-197						91.6	X		26.24	26.24	26.24	1542.03	23.93	23.93	23.93	7081.96
PRV2-198						80.4	X		27.41	27.57	27.49	675.823	23.75	23.74	23.745	8001.58
PRV2-199						67.2			29.99	29.93	29.96	132.408	28.56	28.37	28.465	355.133
PRV2-200						90.2	X		33.83	34.91	34.37	7.21071	29.47	29.26	29.365	196.085
PRV2-201	Atlantic	B1	sentinel	24	2014-07-30	115.2		50	28.52	28.97	28.745	295.217	25.22	25.21	25.215	3032.94
PRV2-202						157.1		55	28.48	28.94	28.71	302.115	20.39	20.4	20.395	72997.7
PRV2-203						120.2		52	29.14	28.91	29.025	245.41	22.19	22.2	22.195	22254.4
PRV2-204						162.8		48	31.73	32.34	32.035	33.6671	25.88	25.86	25.87	1968.5
PRV2-205						136		52	20.91	20.82	20.865	53530.8	20.54	20.56	20.55	65899.9
PRV2-206	Atlantic	B1	PRV donor	24	2014-07-30	160		44	30.8	31	30.9	71.2039	23.54	23.77	23.655	8491.23
PRV2-207						148.1		46	28.67	29.18	28.925	262.152	23.38	23.35	23.365	10282.2
PRV2-208						137		49	28.69	28.76	28.725	299.14	21.22	21.15	21.185	43340.1
PRV2-209						136.1		35	28.22	28.23	28.225	416.08	21.23	21.25	21.24	41795.2
PRV2-210						145.5			28.23	28.64	28.435	362.234	22.99	22.99	22.99	13169.3
PRV2-211	Sockeye	B2	sentinel	24	2014-07-31	323.2		37	31.29	31.26	31.275	55.5938	29.91	29.44	29.675	159.808
PRV2-212						302.7		55	33.6	33.2	33.4	13.6769	28.43	28.71	28.57	331.358
PRV2-213						184.9		34	28.72	28.69	28.705	303.114	23.94	23.99	23.965	6920.26
PRV2-214						236.7		38	22.36	22.34	22.35	20090.6	20.15	20.21	20.18	84125.8
PRV2-215						379.5		40	30.78	30.96	30.87	72.6277	25.41	25.34	25.375	2729.02
PRV2-216	Atlantic	B2	sentinel	24	2014-07-31	128.8		45	29.29	29.52	29.405	190.977	18.27	18.28	18.275	295744
PRV2-217						111.8		51	25.57	25.76	25.665	2253.67	19.93	19.94	19.935	98889
PRV2-218						76.8		32	28.39	28.33	28.36	380.614	18.85	18.87	18.86	201025
PRV2-219						104.8		43	28.55	28.85	28.7	304.116	19.54	19.55	19.545	127916
PRV2-220						119.8		44	25.82	25.86	25.84	2007.87	20	20.03	20.015	93803.6
PRV2-221	Atlantic	B2	PRV donor	24	2014-07-31	188		46	29.82	29.93	29.875	140.048	19.84	19.63	19.735	112842
PRV2-222						166.9		43	30.31	30.38	30.345	102.7	23.84	23.63	23.735	8054.56
PRV2-223						156.8		49	27.83	27.69	27.76	565.522	25.48	25.59	25.535	2455.56
PRV2-224						176.6		47	27.36	27.42	27.39	721.928	21.9	22	21.95	26159.9
PRV2-225						176.7		56	28.79	29.13	28.96	256.166	21.48	21.51	21.495	35321.7
PRV2-226	Sockeye	B3	sentinel	24	2014-07-31	276.4		42	28.28	27.92	28.1	451.859	28.69	28.81	28.75	294.245
PRV2-227						276		53	34	34	34	9.20497	31.21	31.16	31.185	58.9958
PRV2-228						358		44	no Ct	35.87	no Ct	0	no Ct	no Ct	no Ct	0
PRV2-229						180.1		41	29.46	29.59	29.525	176.436	24.54	24.47	24.505	4845.68
PRV2-230						245.1		42	no Ct	no Ct	no Ct	0	no Ct	36.26	no Ct	0
PRV2-231	Atlantic	B3	sentinel	24	2014-07-31	150.9		46	29.27	29.13	29.2	218.643	22.51	22.48	22.495	18257.2
PRV2-232						79.6		37	28.19	28.3	28.245	410.625	26.35	26.24	26.295	1487.06
PRV2-233						114.9		42	28.01	28.33	28.17	431.46	23.18	23.17	23.175	11655.8
PRV2-234						107		35	28.44	28.77	28.605	323.792	22.01	22.02	22.015	25061.4
PRV2-235						115.4		43	31.86	31.21	31.535	46.8283	23.17	23.16	23.165	11733
PRV2-236	Atlantic	B3	PRV donor	24	2014-07-31	163.4		43	28.34	28.23	28.285	399.927	15.41	15.39	15.4	1.97202e+06
PRV2-237						161.3		43	29.16	29.52	29.34	199.347	30.41	30	30.205	112.641
PRV2-238						159		46	29.36	29.34	29.35	198.036	26.22	26.19	26.205	1578.06
PRV2-239						133.2		44	31.72	31.92	31.82	38.7994	18.24	18.29	18.265	297702
PRV2-240						83.7		40	33.82	33.72	33.77	10.7138	27.21	26.7	26.955	961.984
PRV2-271	Atlantic	B1	sentinel	38	2014-11-07	199.8		49	28.29	27.99	28.14	440.087	25.47	25.4	25.435	2623.07
PRV2-272						253.6		53	29.15	29.26	29.205	217.923	25.97	26.29	26.13	1658.13
PRV2-273						199.9		58	29.48	29.54	29.51	178.192	23.85	24.02	23.935	7058.63
PRV2-274						196.6		49	29.94	29.65	29.795	147.64	23.51	23.52	23.515	9313.13
PRV2-275						196.9		47	27.86	27.76	27.81	547.166	19.31	19.34	19.325	147903
PRV2-276	Atlantic	B1	PRV donor	38	2014-11-07	180.4		50	26.58	26.88	26.73	1115.98	22.32	22.47	22.395	19502.7
PRV2-277						184.4		49	28.98	29.04	29.01	247.851	26.46	26.41	26.435	1355.82
PRV2-278						242.9		44	28.27	28.29	28.28	401.249	24	24.15	24.075	6435.7
PRV2-279						160.6		42	28.29	28.15	28.22	417.456	19.56	19.65	19.605	122950
PRV2-280						279.9		48	23.42	23.41	23.415	9948.47	23.95	24.02	23.985	6829.52
PRV2-281	Sockeye	B2	sentinel	38	2014-11-07	162.5		48	30.82	30.33	30.575	88.2371	28.81	29.35	29.08	236.662
PRV2-282						167.1		42	30.39	30.25	30.32	104.408	28.68	28.54	28.61	322.726
PRV2-283						433.7		44	34.72	35.66	35.19	4.19721	32.03	32.25	32.14	31.4131
PRV2-284						356.4		39	29.33	29.81	29.57	171.274	30.24	29.7	29.97	131.537
PRV2-285						168.5		48	28.99	29.23	29.11	232.023	27.75	27.73	27.74	573.036
PRV2-286	Atlantic	B2	sentinel	38	2014-11-07	175		50	28.97	28.83	28.9	266.513	23.81	24.21	24.01	6717.77
PRV2-287						209.1		51	28.95	28.8	28.875	270.946	24.63	24.62	24.625	4476.74
PRV2-288						248.2		45	24.61	24.58	24.595	4566.25	22.94	22.88	22.91	13883.3
PRV2-289						245.4		43	25.94	25.97	25.955	1861.12	22.81	22.82	22.815	14781.6
PRV2-290						197.6		44	31.46	31.67	31.565	45.9103	25.48	25.39	25.435	2623.07
PRV2-291	Atlantic	B2	PRV donor	38	2014-11-07	296.8		55	31.13	30.86	30.995	66.8769	26.73	26.75	26.74	1108.63
PRV2-292						273.4		38	31.28	31	31.14	60.7741	25.54	25.77	25.655	2268.59
PRV2-293						226.4		53	30.73	29.88	30.305	105.447	25.88	25.86	25.87	1968.5
PRV2-294						316.5		50	26.57	26.52	26.545	1260.89	23.02	23.02	23.02	12911.2
PRV2-295						411.3		50	27.92	27.61	27.765	563.659	24.3	24.32	24.31	5511.16
PRV2-296	Sockeye	B3	sentinel	38	2014-11-07	378.7		43	33.97	32.28	33.125	16.3985	26.25	26.36	26.305	1477.28
PRV2-297						639.7		49	39.62	34.7	37.16	1.14379	31.21	30.66	30.935	69.5781
PRV2-298						172.4		37	34	no Ct	no Ct	0	31.52	31.92	31.72	41.4463
PRV2-299						355		47	no Ct	no Ct	no Ct	0	no Ct	no Ct	no Ct	0
PRV2-300						434.7		50	34.21	34.67	34.44	6.88518	30.49	30.41	30.45	95.8246
PRV2-301	Atlantic	B3	sentinel	38	2014-11-07	277.6		44	21.61	21.53	21.57	33616	17.97	18.17	18.07	338587
PRV2-302						218.7		47	28.88	28.98	28.93	261.288	23.59	23.61	23.6	8805.09
PRV2-303						210.8		41	23.6	23.71	23.655	8491.23	23.33	23.32	23.325	10557.3
PRV2-304						221.7		40	30.49	30.82	30.655	83.6994	25.47	25.38	25.425	2640.44
PRV2-305						281.8		47	23.43	23.4	23.415	9948.47	23.63	23.85	23.74	8028.03
PRV2-306	Atlantic	B3	PRV donor	38	2014-11-07	213.9		51	25.42	25.49	25.455	2588.68	21.98	22	21.99	13477.1
PRV2-307						332.1		50	29.36	28.98	29.17	223.015	22.94	22.97	22.955	14114.3
PRV2-308						268.8		48	27.79	27.93	27.86	529.406	22.87	22.9	22.885	14114.3
PRV2-309						241.6		47	27.59	27.57	27.58	636.852	21.93	21.87	21.9	27037.4
PRV2-310						318.4		48	28.81	29.17	28.99	251.144	15.27	15.22	15.245	2.18441e+06
PRV2-311	Atlantic	B1	sentinel	41	2014-11-27	263		47	29.32	29.22	29.27	208.772	24.48	24.47	24.475	4942.57
PRV2-312						262.4	X	50	28.87	29.4	29.135	228.226	24.28	24.34	24.31	5511.16
PRV2-313						287.3		53	30.16	29.87	30.015	127.688	26.21	26.24	26.225	1557.37
PRV2-314						257.8			32.21	31.84	32.025	33.89	29.32	27	28.16	434.317
PRV2-315						186.1	X	46	28.78	28.76	28.77	290.387	23.83	23.81	23.82	7615.18
PRV2-316	Atlantic	B1	PRV donor	41	2014-11-27	284.8	X	50	28.93	28.76	28.845	276.364	19.9	20.14	20.02	93494.6
PRV2-317						244.1		50	30.64	30.4	30.52	91.4986	30.84	31.54	31.19	58.8014
PRV2-318						239.1	X	47	28.84	28.96	28.9	266.513	22.83	22.92	22.875	14207.7
PRV2-319						340.3		44	31.65	33.42	32.535	24.2048	26.43	26.48	26.455	1338.05
PRV2-320						196.3		33	29.8	29.96	29.88	139.586	23.16	23.19	23.175	11655.8
PRV2-321	Sockeye	B2	sentinel	41	2014-11-26	188		43	no Ct	no Ct	no Ct	0	37.73	no Ct	no Ct	0
PRV2-322						107.1	X	47	27.2	26.91	27.055	900.549	23.61	23.76	23.685	8324.77
PRV2-323						341.6		40	no Ct	no Ct	no Ct	0	36.32	no Ct	no Ct	0
PRV2-324						446	X	46	35.87	33.83	34.85	5.25299	33.51	34.85	34.18	8.17398
PRV2-325						305.5	X	48	30.68	30.31	30.495	93.0207	27.77	27.93	27.85	532.911
PRV2-326	Atlantic	B2	sentinel	41	2014-11-26	244.6	X	51	29.37	29.4	29.385	193.514	24.17	23.98	24.075	6435.7
PRV2-327						202.3		51	29.59	29.43	29.51	178.192	24.42	24.51	24.465	4975.3
PRV2-328						287.6	X	47	29.24	29.19	29.215	216.489	22.58	22.6	22.59	17147.7
PRV2-329						234.8	X	50	29.52	29.24	29.38	194.154	24.47	24.43	24.45	5024.79
PRV2-330						282		57	26.3	26.29	26.295	1487.06	25.58	25.54	25.56	2415.37
PRV2-331	Atlantic	B2	PRV donor	41	2014-11-26	440.5	X	52	35.18	36.37	35.775	2.85296	19.44	19.48	19.46	135296
PRV2-332						264.5	X	46	30.98	31.21	31.095	62.6059	20.43	20.53	20.48	69015.6
PRV2-333						338.5	X	51	29.32	29.22	29.27	208.772	20.68	20.82	20.75	57751.5
PRV2-334						291.2		47	31.95	32.35	32.15	31.2065	25.52	25.52	25.52	2479.98
PRV2-335						189.3		44	32.64	32.39	32.515	24.5264	27.35	27.29	27.32	756.06
PRV2-336	Sockeye	B3	sentinel	41	2014-11-26	170.7		44	no Ct	no Ct	no Ct	0	31.25	30.98	31.115	61.785
PRV2-337						528.9		51	35.81	no Ct	no Ct	0	33.01	33.22	33.115	16.5071
PRV2-338						261	X	43	29.84	29.71	29.775	149.602	26.19	26	26.095	1696.87
PRV2-339						452.1	X	49	34.81	no Ct	no Ct	0	31.99	32.91	32.45	25.6014
PRV2-340						365.6	X	53	34.28	35.89	35.085	4.49836	29.18	29.43	29.305	204.005
PRV2-341	Atlantic	B3	sentinel	41	2014-11-26	201		55	34.3	34.92	34.61	6.15449	28.56	28.51	28.535	339.101
PRV2-342						341.9	X	50	30.62	30.4	30.51	92.1044	23.99	23.98	23.985	6829.52
PRV2-343						264.2	X	51	30.74	31.4	31.07	63.6474	22.78	22.6	22.69	16052.6
PRV2-344						237.2		50	29.91	30.14	30.025	126.848	25.26	25.17	25.215	3032.94
PRV2-345						267.1		46	30.79	30.82	30.805	75.8109	24.34	24.44	24.39	5227.75
PRV2-346	Atlantic	B3	PRV donor	41	2014-11-26	261.3		48	32.57	34.13	33.35	14.1357	26.19	26.3	26.245	1536.95
PRV2-347						292.3	X	51	30.17	30.31	30.24	110.069	21.82	21.89	21.855	27852.4
PRV2-348						290.4		50	30.49	30.6	30.545	90.0014	25.41	25.56	25.485	2537.93
PRV2-349						230.7		45	36.35	33.38	34.865	5.20125	27.83	27.91	27.87	525.924
PRV2-350						305.2		44	31.71	31.84	31.775	39.969	27.55	27.453	27.5015	670.714
PRV2-351	Atlantic	B1	sentinel	51	2015-02-06	265			28.7	28.36	28.53	340.222
PRV2-352						372.6			30.29	30.59	30.44	96.4591
PRV2-353						261.7			26.29	26.14	26.215	1567.68
PRV2-354						311.7	X		34.8	33.73	34.265	7.72808
PRV2-355						239.6			28.98	28.99	28.985	251.974
PRV2-356	Atlantic	B1	PRV donor	51	2015-02-06	327.8			31.04	31.72	31.38	51.872
PRV2-357						466.7			29.47	29.75	29.61	166.812
PRV2-358						567.3			33.25	35.84	34.545	6.42424
PRV2-359						359.1			20.54	21.78	21.16	44061
PRV2-360						610.1			27.93	28.17	28.05	467.018

## Sheet: 4. Secondary Cohab (1)
Supportive information file S2: Sample inventory and PRV screening results associated with the second PRV cohabitation challenge (denoted as secondary cohabitation (1) in Figure 4).
Fish ID	Species	Tank	Treatment	Sample timepoint (weeks post cohab)	Sampling date	Weight (g)	Head Kidney Ct 1	Head Kidney Ct 2	Average Head Kidney Ct	Viral load (copies µg RNA-1)	Blood Ct 1	Blood Ct 2	Average Blood Ct	Viral load (copies µg RNA-1)
PRV3-1	Sockeye	Brett F	sentinel	Pre-challenge screen of fish stock to verify PRV negative status	2014-11-13						no Ct	no Ct	no Ct	0
PRV3-2											no Ct	no Ct	no Ct	0
PRV3-3											no Ct	no Ct	no Ct	0
PRV3-4											no Ct	no Ct	no Ct	0
PRV3-5											no Ct	no Ct	no Ct	0
PRV3-6											no Ct	no Ct	no Ct	0
PRV3-7											no Ct	no Ct	no Ct	0
PRV3-8											no Ct	no Ct	no Ct	0
PRV3-9											no Ct	no Ct	no Ct	0
PRV3-10											no Ct	no Ct	no Ct	0
PRV3-11											no Ct	no Ct	no Ct	0
PRV3-12											no Ct	no Ct	no Ct	0
PRV3-13											no Ct	no Ct	no Ct	0
PRV3-14											no Ct	no Ct	no Ct	0
PRV3-15											no Ct	no Ct	no Ct	0
PRV3-16											no Ct	no Ct	no Ct	0
PRV3-17											no Ct	no Ct	no Ct	0
PRV3-18											no Ct	no Ct	no Ct	0
PRV3-19											no Ct	no Ct	no Ct	0
PRV3-20											no Ct	no Ct	no Ct	0
PRV3-21											no Ct	no Ct	no Ct	0
PRV3-22											no Ct	no Ct	no Ct	0
PRV3-23											no Ct	no Ct	no Ct	0
PRV3-24											no Ct	no Ct	no Ct	0
PRV3-25											no Ct	no Ct	no Ct	0
PRV3-26											no Ct	no Ct	no Ct	0
PRV3-27											no Ct	no Ct	no Ct	0
PRV3-28											no Ct	no Ct	no Ct	0
PRV3-29											no Ct	no Ct	no Ct	0
PRV3-30											no Ct	no Ct	no Ct	0
PRV3-31											no Ct	no Ct	no Ct	0
PRV3-32											no Ct	no Ct	no Ct	0
PRV3-33											no Ct	no Ct	no Ct	0
PRV3-34											no Ct	no Ct	no Ct	0
PRV3-35											no Ct	no Ct	no Ct	0
PRV3-36											no Ct	no Ct	no Ct	0
PRV3-37											no Ct	no Ct	no Ct	0
PRV3-38											no Ct	no Ct	no Ct	0
PRV3-39											no Ct	no Ct	no Ct	0
PRV3-40											no Ct	no Ct	no Ct	0
PRV3-41	Sockeye	B4	sentinel	4	2014-12-15						no Ct	no Ct	no Ct	0
PRV3-42											no Ct	no Ct	no Ct	0
PRV3-43											no Ct	no Ct	no Ct	0
PRV3-44											no Ct	no Ct	no Ct	0
PRV3-45											no Ct	no Ct	no Ct	0
PRV3-46											no Ct	no Ct	no Ct	0
PRV3-47											no Ct	no Ct	no Ct	0
PRV3-48											no Ct	no Ct	no Ct	0
PRV3-49											no Ct	no Ct	no Ct	0
PRV3-50											no Ct	no Ct	no Ct	0
PRV3-51	Atlantic	B4	PRV donor	4	2014-12-15						14.93	15.01	14.97	2.61909e+06
PRV3-52											24.33	24.43	24.38	5262.36
PRV3-53											24.82	24.81	24.815	3949.18
PRV3-54											27.77	27.51	27.64	612.128
PRV3-55											28.34	28.21	28.275	402.575
PRV3-56	Sockeye	B5	sentinel	4	2014-12-15						no CT	no CT	no Ct	0
PRV3-57											no CT	no CT	no Ct	0
PRV3-58											no CT	no CT	no Ct	0
PRV3-59											no CT	no CT	no Ct	0
PRV3-60											no CT	no CT	no Ct	0
PRV3-61											no CT	no CT	no Ct	0
PRV3-62											no CT	no CT	no Ct	0
PRV3-63											no CT	no CT	no Ct	0
PRV3-64											no CT	no CT	no Ct	0
PRV3-65											no CT	no CT	no Ct	0
PRV3-66	Sockeye	B5	PRV donor	4	2014-12-15						33.23	34.71	33.97	9.38903
PRV3-67											24.96	24.96	24.96	3588.79
PRV3-68											29.8	29.86	29.83	144.269
PRV3-69											26.12	26.23	26.175	1609.61
PRV3-70											27.3	27.29	27.295	768.638
PRV3-71	sockeye	B6	sentinel	4	2014-12-15						no CT	no CT	no Ct	0
PRV3-72											no CT	no CT	no Ct	0
PRV3-73											no CT	no CT	no Ct	0
PRV3-74											no CT	no CT	no Ct	0
PRV3-75											no CT	no CT	no Ct	0
PRV3-76											no CT	no CT	no Ct	0
PRV3-77											no CT	no CT	no Ct	0
PRV3-78											no CT	no CT	no Ct	0
PRV3-79											no CT	no CT	no Ct	0
PRV3-80	Atlantic	B6	PRV donor	4	2014-12-15						23.37	23.5	23.435	9818.02
PRV3-81											24.42	24.27	24.345	5385.32
PRV3-82											24.31	24.28	24.295	5565.99
PRV3-83											23.44	23.33	23.385	10147.4
PRV3-84											27.19	27.19	27.19	823.788
PRV3-85	Sockeye	B7	sentinel	4	2014-12-15						no CT	no CT	no Ct	0
PRV3-86											no CT	no CT	no Ct	0
PRV3-87											no CT	no CT	no Ct	0
PRV3-88											no CT	no CT	no Ct	0
PRV3-89											35.9	35.85	35.875	2.67076
PRV3-90											no CT	no CT	no Ct	0
PRV3-91											no CT	no CT	no Ct	0
PRV3-92	Sockeye	B7	PRV donor	4	2014-12-15						28.71	28.77	28.74	296.193
PRV3-93											30.26	30.34	30.3	105.796
PRV3-94											27.53	27.44	27.485	678.057
PRV3-95											28.8	28.57	28.685	307.141
PRV3-96	Sockeye	B4	sentinel	6	2014-12-30	206.4	no Ct	no Ct	no Ct	0	no CT	no CT	no Ct	0
PRV3-97						93.3	no Ct	no Ct	no Ct	0	no CT	no CT	no Ct	0
PRV3-98						131.9	no Ct	no Ct	no Ct	0	no CT	no CT	no Ct	0
PRV3-99						140.7	no Ct	no Ct	no Ct	0	no CT	no CT	no Ct	0
PRV3-100						145.5	no Ct	no Ct	no Ct	0	no CT	no CT	no Ct	0
PRV3-101						81.4	no Ct	no Ct	no Ct	0	no CT	no CT	no Ct	0
PRV3-102						112.9	no Ct	no Ct	no Ct	0	no CT	no CT	no Ct	0
PRV3-103						150.1	no Ct	no Ct	no Ct	0	no CT	no CT	no Ct	0
PRV3-104	Atlantic	B4	PRV donor	6	2014-12-30	403.5	32.72	31.67	32.195	30.2934	29.34	29.24	29.29	206.035
PRV3-105						330.5	32.9	32.31	32.605	23.1121	22.75	22.83	22.79	15027.5
PRV3-106						417.4	33.31	33.38	33.345	14.1824	29.24	29.21	29.225	215.065
PRV3-107						347.8	32.32	31.36	31.84	38.2907	27.78	27.42	27.6	628.502
PRV3-108						301.7	31.45	30.83	31.14	60.7741	25.39	25.51	25.45	2597.24
PRV3-109	Sockeye	B5	sentinel	6	2014-12-30	142.6	no Ct	no Ct	no Ct	0	no CT	no CT	no Ct	0
PRV3-112						163.5	no Ct	no Ct	no Ct	0	no CT	no CT	no Ct	0
PRV3-113						137.4	no Ct	no Ct	no Ct	0	no CT	no CT	no Ct	0
PRV3-114						215.3	no Ct	no Ct	no Ct	0	no CT	no CT	no Ct	0
PRV3-115						114.6	no Ct	no Ct	no Ct	0	no CT	no CT	no Ct	0
PRV3-116						124.9	no Ct	no Ct	no Ct	0	no CT	no CT	no Ct	0
PRV3-117						113.5	no Ct	no Ct	no Ct	0	no CT	no CT	no Ct	0
PRV3-118						129.8	no Ct	no Ct	no Ct	0	no CT	no CT	no Ct	0
PRV3-119						154.7	no Ct	no Ct	no Ct	0	no CT	no CT	no Ct	0
PRV3-123						194.5	no Ct	no Ct	no Ct	0	no CT	no CT	no Ct	0
PRV3-110	Sockeye	B5	PRV donor	6	2014-12-30	189.3	35.93	35.64	35.785	2.83419	29.71	29.51	29.61	166.812
PRV3-111						121.2	no Ct	no Ct	no Ct	0	no CT	no CT	no Ct	0
PRV3-120						306.7	31.96	34.4	33.18	15.8139	27.5	27.51	27.505	669.166
PRV3-121						221.4	36.86	35.96	36.41	1.87629	31.13	31.14	31.135	60.9749
PRV3-122						330.5	30.85	30.75	30.8	76.0614	27.79	27.42	27.605	626.431
PRV3-124	Sockeye	B6	sentinel	6	2014-12-30	106.4	no Ct	no Ct	no Ct	0	no CT	no CT	no Ct	0
PRV3-125						86.7	no Ct	no Ct	no Ct	0	no CT	no CT	no Ct	0
PRV3-126						107	no Ct	no Ct	no Ct	0	no CT	no CT	no Ct	0
PRV3-127						111.1	no Ct	no Ct	no Ct	0	no CT	no CT	no Ct	0
PRV3-128						80.5	no Ct	no Ct	no Ct	0	no CT	no CT	no Ct	0
PRV3-129						123.7	no Ct	no Ct	no Ct	0	no CT	no CT	no Ct	0
PRV3-130						163.4	no Ct	no Ct	no Ct	0	no CT	no CT	no Ct	0
PRV3-131						98.7	no Ct	no Ct	no Ct	0	no CT	no CT	no Ct	0
PRV3-132						148.6	no Ct	no Ct	no Ct	0	no CT	no CT	no Ct	0
PRV3-133	Atlantic	B6	PRV donor	6	2014-12-30	208.7	29.61	28.99	29.3	204.68	26.64	26.47	26.555	1252.6
PRV3-134						328.7	28.68	28.75	28.715	301.12	23.8	23.55	23.675	8379.89
PRV3-135						221.5	32.96	31.51	32.235	29.5042	24.31	24.29	24.3	5547.65
PRV3-136						286.9	29.5	29.29	29.395	192.242	25.55	25.7	25.625	2313.96
PRV3-137						320.3	31.18	30.31	30.745	78.8729	26.88	26.84	26.86	1024.23
PRV3-138	Sockeye	B7	sentinel	6	2014-12-30	119.9	no Ct	no Ct	no Ct	0	no CT	no CT	no Ct	0
PRV3-139						91.2	no Ct	no Ct	no Ct	0	no CT	no CT	no Ct	0
PRV3-140						102.5	no Ct	no Ct	no Ct	0	no CT	no CT	no Ct	0
PRV3-141						120.2	no Ct	no Ct	no Ct	0	no CT	no CT	no Ct	0
PRV3-142						209.1	no Ct	no Ct	no Ct	0	no CT	no CT	no Ct	0
PRV3-143						133.9	no Ct	no Ct	no Ct	0	no CT	no CT	no Ct	0
PRV3-144						168.6	no Ct	no Ct	no Ct	0
PRV3-145	Sockeye	B7	PRV donor	6	2014-12-30	361.9	33.75	no Ct	no Ct	0	27.23	27.48	27.355	738.797
PRV3-146						393.5	32.56	32.49	32.525	24.3651	29.55	29.56	29.555	172.978
PRV3-147						404.1	no Ct	no Ct	no Ct	0	35.83	34.83	35.33	3.8268
PRV3-148						459.6	no Ct	no Ct	no Ct	0	30.32	30.38	30.35	102.362

## Sheet: 5. Secondary Cohab (2)
Supportive information file S2: Sample inventory and PRV screening results associated with the third PRV cohabitation challenge (denoted as Secondary cohabitation (2) in Figure 4).
Fish ID	Species	Tank	Treatment	Sample date	Weight (g)	Head Kidney Ct 1	Head Kidney Ct 2	Average Head KidneyCt	Viral load (copies µg RNA-1)	Blood Ct 1	Blood Ct 2	Average Blood Ct	Viral load (copies µg RNA-1)
PRV4-1	Atlantic	B6	PRV+ injection	2015-04-13	38.61					36.54	no Ct	no Ct	0
PRV4-2					45.12					33.29	33.05	33.17	15.9187
PRV4-3					42.93					no Ct	no Ct	no Ct	0
PRV4-4					54.93					no Ct	no Ct	no Ct	0
PRV4-5					38.88					30.71	30.78	30.745	78.8729
PRV4-6	Sockeye	B7	PRV+ injection	2015-04-13	33.94					no Ct	no Ct	no Ct	0
PRV4-7					42.76					no Ct	no Ct	no Ct	0
PRV4-8					42.68					no Ct	no Ct	no Ct	0
PRV4-9					31.46					no Ct	no Ct	no Ct	0
PRV4-10					30.88					no Ct	no Ct	no Ct	0
PRV4-11	Atlantic	B6	PRV+ injection	2015-05-12	42.5	20.37	20.41	20.39	73238.9
PRV4-12					41.5	22	22	22	25310.7
PRV4-13					39.8	20.39	20.37	20.38	73723.9
PRV4-14					31.3	21.98	21.79	21.885	27306.4
PRV4-15					46	19.92	19.94	19.93	99215.9
PRV4-16					37	18.83	18.82	18.825	205722
PRV4-17					44.1	19.62	19.74	19.68	117013
PRV4-18					86.8	18.87	18.66	18.765	214032
PRV4-19					42.2	23.93	23.95	23.94	7035.38
PRV4-20					43.2	18.25	18.22	18.235	303655
PRV4-21	Sockeye	B7	PRV+ injection	2015-05-12	44.8	40.24	no Ct	no Ct	0
PRV4-22					36.7	no Ct	no Ct	no Ct	0
PRV4-23					42.3	no Ct	no Ct	no Ct	0
PRV4-24					78.8	30.39	30	30.195	113.387
PRV4-25					47.3	34.34	34.25	34.295	7.57659
PRV4-26					46.1	no Ct	no Ct	no Ct	0
PRV4-27					45.3	29.83	29.93	29.88	139.586
PRV4-28					47	no Ct	no Ct	no Ct	0
PRV4-29					31.9	36.56	no Ct	no Ct	0
PRV4-30	Atlantic	B2	sentinel	2015-05-12	81.8	no Ct	no Ct	no Ct	0	no Ct	no Ct	no Ct	0
PRV4-31					45.3	no Ct	no Ct	no Ct	0	no Ct	no Ct	no Ct	0
PRV4-32					69.8	no Ct	no Ct	no Ct	0	no Ct	no Ct	no Ct	0
PRV4-33					74.8	no Ct	no Ct	no Ct	0	no Ct	no Ct	no Ct	0
PRV4-34					64.9	no Ct	no Ct	no Ct	0	no Ct	no Ct	no Ct	0
PRV4-35					56	no Ct	no Ct	no Ct	0	no Ct	no Ct	no Ct	0
PRV4-36					60.9	no Ct	no Ct	no Ct	0	no Ct	no Ct	no Ct	0
PRV4-37					46	no Ct	no Ct	no Ct	0	no Ct	no Ct	no Ct	0
PRV4-38					45.1	no Ct	no Ct	no Ct	0	no Ct	no Ct	no Ct	0
PRV4-39					36.2	no Ct	no Ct	no Ct	0	no Ct	no Ct	no Ct	0
PRV4-40					56.7	no Ct	no Ct	no Ct	0	no Ct	no Ct	no Ct	0
PRV4-41					43.4	no Ct	no Ct	no Ct	0	no Ct	no Ct	no Ct	0
PRV4-42					42.9	no Ct	no Ct	no Ct	0	no Ct	no Ct	no Ct	0
PRV4-43					53.4	no Ct	no Ct	no Ct	0	no Ct	no Ct	no Ct	0
PRV4-44					54	no Ct	no Ct	no Ct	0	no Ct	no Ct	no Ct	0
PRV4-45					52.7	no Ct	no Ct	no Ct	0	no Ct	no Ct	no Ct	0
PRV4-46					57.6	no Ct	no Ct	no Ct	0	no Ct	no Ct	no Ct	0
PRV4-47					52.2	no Ct	no Ct	no Ct	0	no Ct	no Ct	no Ct	0
PRV4-48					46.4	no Ct	no Ct	no Ct	0	no Ct	no Ct	no Ct	0
PRV4-49					45.5	no Ct	no Ct	no Ct	0	no Ct	no Ct	no Ct	0
PRV4-50					43.9	no Ct	no Ct	no Ct	0	no Ct	no Ct	no Ct	0
PRV4-51					44.4	no Ct	no Ct	no Ct	0	no Ct	no Ct	no Ct	0
PRV4-52					48.4	no Ct	no Ct	no Ct	0	no Ct	no Ct	no Ct	0
PRV4-53					31.5	no Ct	no Ct	no Ct	0	no Ct	no Ct	no Ct	0
PRV4-54					50.9	no Ct	no Ct	no Ct	0	no Ct	no Ct	no Ct	0
PRV4-55					31	no Ct	no Ct	no Ct	0	no Ct	no Ct	no Ct	0
PRV4-56					48.9	no Ct	no Ct	no Ct	0	36.6	no Ct	no Ct	0
PRV4-57					46.1	no Ct	no Ct	no Ct	0	no Ct	no Ct	no Ct	0
PRV4-58					57.5	no Ct	no Ct	no Ct	0	no Ct	no Ct	no Ct	0
PRV4-59					42.1	no Ct	no Ct	no Ct	0	no Ct	no Ct	no Ct	0
PRV4-61	Atlantic	B2	PRV donor	2015-05-12	426	28.78	28.62	28.7	304.116	21.65	21.53	21.59	33175.2
PRV4-62					450	26.17	26.43	26.3	1482.16	24.43	24.38	24.405	5176.25
PRV4-63					428	21.67	21.71	21.69	31056.5	18.81	18.97	18.89	197084
PRV4-64					460	21.7	21.68	21.69	31056.5	19.32	19.36	19.34	146447
PRV4-65					493	22.96	23.35	23.155	11810.7	21.35	21.35	21.35	38868.6
PRV4-66					577	25.36	25.51	25.435	2623.07	25.27	25.44	25.355	2765.28
PRV4-67					447	27.87	27.93	27.9	515.614	22.23	22.18	22.205	22108.1
PRV4-68					338	21	20.97	20.985	49455.1	20.5	20.5	20.5	68110.7
PRV4-69					451	30.92	31.28	31.1	62.3997	21.36	21.39	21.375	38232.6
PRV4-70					499	23.35	23.65	23.5	9405.78	17.35	17.46	17.405	525126
PRV4-71					492	32.72	32.29	32.505	24.6888	26.19	26.23	26.21	1572.86
PRV4-72					455	27.17	27.25	27.21	812.986	22.62	22.51	22.565	17433
PRV4-73					314	23.35	23.47	23.41	9981.35	19.75	19.73	19.74	112470
PRV4-74					408	29.81	29.46	29.635	164.082	18.58	18.55	18.565	244230
PRV4-75					454	24.1	23.94	24.02	6673.58	22.25	22.4	22.325	20424.8
PRV4-76					487	27.54	27.52	27.53	658.217	no Ct	no Ct	no Ct	0
PRV4-77					291	25.9	26.01	25.955	1861.12	20.66	20.65	20.655	61488.1
PRV4-78					685	31.59	31.35	31.47	48.8808	23.34	23.4	23.37	10248.3
PRV4-79					370	24.79	24.97	24.88	3783.36	20.33	20.45	20.39	73238.9
PRV4-80					623	25.99	26.41	26.2	1583.27	20.54	20.73	20.635	62305.1
PRV4-81					390	30.79	31.33	31.06	64.0688	26.21	26.26	26.235	1547.12
PRV4-82					484	21.87	21.88	21.875	27487.2	19.4	19.36	19.38	142631
PRV4-83					482	23.15	23.19	23.17	11694.3	17.27	17.3	17.285	568403
PRV4-84					407	26.84	26.84	26.84	1037.83	26.32	26.27	26.295	1487.06
PRV4-85					385	24.99	25.24	25.115	3239.85	20.86	21.18	21.02	48325.9

## Sheet: 6.Inj & Primary cohab Mortality
Supportive information file S2: Summary of fish mortalities throughout the PRV injection challenge and primary cohabitation experiments
Fish ID	Challenge	Species	Treatment	Tank	Date of mortality	Histology sample	Sampling Time point (dpc)	Head Kidney Ct 1	Head Kidney Ct 2	Average Head Kidney Ct	Viral load per ug RNA	Blood Ct 1	Blood Ct 2	Average Blood Ct	Viral load per ug RNA	Comments
	Injection	Atlantic	PRV+ injected	Q109	2014-03-03		28	no Ct	no Ct	no Ct	0	no Ct	no Ct	no Ct	0
		Atlantic	PRV+ injected	Q109	2014-02-06		3	no Ct	no Ct	no Ct	0	no Ct	no Ct	no Ct	0	High scale loss
		Atlantic	Neg tissue injected	Q105	2014-02-09		6	no Ct	no Ct	no Ct	0	no Ct	no Ct	no Ct	0	Fungus on head
	Cohabitation	Atlantic	sentinel	B3	2014-02-17		14
		Sockeye	sentinel	B3	2014-02-17		14
		Sockeye	sentinel	B3	2014-02-17		14
		Sockeye	sentinel	B3	2014-02-17		14									moribund
		Atlantic	sentinel	B1	2014-02-17		14
		Atlantic	sentinel	B3	2014-02-18		15
		Atlantic	donor	B1	2014-02-18		15									large fungal/bacterial lesion
		Sockeye	sentinel	B3	2014-02-19		16
		Atlantic	sentinel	B1	2014-02-20		17
		Atlantic	sentinel	B1	2014-02-21		18
		Atlantic	sentinel	B2	2014-02-23		20
		Atlantic	sentinel	B1	2014-02-23		20
		Atlantic	sentinel	B1	2014-02-25		22									tail rot
		Atlantic	sentinel	B1	2014-02-25		22									tail rot
		Atlantic	sentinel	B1	2014-02-28		25									tail rot
		Atlantic	sentinel	B2	2014-03-01		26
		Atlantic	sentinel	B3	2014-03-02		27
		Sockeye	sentinel	B3	2014-03-10		35									vent lesion, hem. Rash bodywall
120A		Atlantic	donor	B3	2014-03-13	X	38	22.97	22.78	22.875	1775.96	8.87	8.8	8.835	1.8767e+07
		Atlantic	donor	B3	2014-03-14		39
		Atlantic	donor	B1	2014-03-17		42									large fungal/bacterial lesion, runt
		Atlantic	donor	B3	2014-03-31		56									runt
		Atlantic	donor	B1	2014-04-02		58									runt
160A		Atlantic	donor	B1	2014-04-03	X	59	25.26	25.29	25.275	364.399	18.24	18.18	18.21	38588.2
		Atlantic	donor	B2	2014-04-04		60									mort, belly lesions
160B		Atlantic	sentinel	B2	2014-04-10	X	66	no Ct	no Ct	no Ct	0	32.26	32.8	32.53	3.0356	moribund
		Atlantic	donor	B1	2014-04-18		74									gill + belly hemorrhaging
		Atlantic	donor	B2/B3	2014-04-18		74									Fish found on floor outside of tank
		Atlantic	sentinel	B1	2014-04-19		75									slight hemorrhaging
		Atlantic	donor	B2	2014-04-26		82									bloody ascites
		Atlantic	sentinel	B1	2014-04-27		83
		Atlantic	sentinel	B2	2014-04-30		86
		Atlantic	donor	B1	2014-05-08		94									runt
		Atlantic	sentinel	B1	2014-05-15		101									large fungal/bacterial lesion, fin hem., snakey
		Atlantic	sentinel	B1	2014-05-18		104									runt
		Atlantic	donor	B2	2014-05-21		107									moribund, runt
		Sockeye	sentinel	B2	2014-05-21		107
		Atlantic	sentinel	B1	2014-05-25		111									runt, high scale loss
		Atlantic	donor	B3	2014-05-31		117									moribund, runt
		Atlantic	sentinel	B3	2014-06-03		120
		Atlantic	donor	B1	2014-07-14		161									runk
		Atlantic	donor	B2	2014-07-14		161									runt
		Atlantic	sentinel	B1	2014-07-15		162									runt
		Atlantic	sentinel	B1	2014-07-19		166									runt
15-002-1		Atlantic	donor	B3	2014-07-20	X	167									moribund
15-002-2		Atlantic	donor	B3	2014-07-23	X	171	22.36	22.43	22.395	2437.84					mort, runt
				B3	2014-07-30		178	31.67	32.46	32.065	4.12588
		Sockeye	sentinel	B2	2014-08-02		181	31.26	30.75	31.005	8.30463
		Atlantic	sentinel	B1	2014-08-05		184									runt
15-002-4				B2	2014-08-08	X	187									dark fish culled
		Atlantic		B2	2014-08-13		192									high post-mortem degradation
15-002-5		Sockeye	sentinel	B2	2014-08-14	X	193
15-002-3		Sockeye	sentinel	B3	2014-08-21	X	200	29.3	29.21	29.255	26.3562	23.94	23.98	23.96	867.892
15-002-6		Sockeye	sentinel	B2	2014-08-27	X	206	30.42	30.4	30.41	12.2985
		Sockeye	sentinel	B3	2014-10-09		249									Fish found on floor outside of tank
		Atlantic	sentinel	B3	2014-10-09		249
		Sockeye	sentinel	B3	2014-10-25		265
		Atlantic	donor	B1/B2/B3	2014-10-27		267									Fish found on floor outside of tank
		Atlantic	donor	B1/B2/B3	2014-10-29		269									Fish found on floor outside of tank
		Atlantic	sentinel	B3	2014-10-29		269									Fish found on floor outside of tank
		Atlantic	donor	B1/B2/B3	2014-10-31		271									Fish found on floor outside of tank
		Sockeye	sentinel	B3	2014-11-12		283
		Sockeye	sentinel	B3	2014-11-20		291									Jack

## Sheet: 7. Primary cohab daily mort log
	Tank B1		Tank B2			Tank B3
date	Donor Atlantic	Sentinel Atlantic	Donor Atlantic	Sentinel Atlantic	Sentinel Sockeye	Donor Atlantic	Sentinel Atlantic	Sentinel Sockeye
2014-02-13
2014-02-14
2014-02-15
2014-02-16
2014-02-17		1					1	3
2014-02-18	1						1
2014-02-19								1
2014-02-20		2
2014-02-21		1
2014-02-22
2014-02-23		1		1
2014-02-24
2014-02-25		2
2014-02-26
2014-02-27
2014-02-28		1
2014-03-01				1
2014-03-02							1
2014-03-03
2014-03-04
2014-03-05
2014-03-06
2014-03-07
2014-03-08
2014-03-09
2014-03-10								1
2014-03-11
2014-03-12
2014-03-13
2014-03-14						1
2014-03-15
2014-03-16
2014-03-17	1
2014-03-18
2014-03-19
2014-03-20
2014-03-21
2014-03-22
2014-03-23
2014-03-24
2014-03-25
2014-03-26
2014-03-27
2014-03-28
2014-03-29
2014-03-30
2014-03-31						1
2014-04-01
2014-04-02	1
2014-04-03
2014-04-04			1
2014-04-05
2014-04-06
2014-04-07
2014-04-08
2014-04-09
2014-04-10				1
2014-04-11
2014-04-12
2014-04-13
2014-04-14
2014-04-15
2014-04-16
2014-04-17
2014-04-18	1
2014-04-19		1
2014-04-20
2014-04-21
2014-04-22
2014-04-23
2014-04-24
2014-04-25
2014-04-26			1
2014-04-27		1
2014-04-28
2014-04-29
2014-04-30				1
2014-05-01
2014-05-02
2014-05-03
2014-05-04
2014-05-05
2014-05-06
2014-05-07
2014-05-08	1
2014-05-09
2014-05-10
2014-05-11
2014-05-12
2014-05-13
2014-05-14
2014-05-15		1
2014-05-16
2014-05-17
2014-05-18		1
2014-05-19
2014-05-20
2014-05-21			1		1
2014-05-22
2014-05-23
2014-05-24
2014-05-25		1
2014-05-26
2014-05-27
2014-05-28
2014-05-29
2014-05-30
2014-05-31						1
2014-06-01
2014-06-02
2014-06-03							1
2014-06-04
2014-06-05
2014-06-06
2014-06-07
2014-06-08
2014-06-09
2014-06-10
2014-06-11
2014-06-12
2014-06-13
2014-06-14
2014-06-15
2014-06-16
2014-06-17
2014-06-18
2014-06-19
2014-06-20
2014-06-21
2014-06-22
2014-06-23
2014-06-24
2014-06-25
2014-06-26
2014-06-27
2014-06-28
2014-06-29
2014-06-30
2014-07-01
2014-07-02
2014-07-03
2014-07-04
2014-07-05
2014-07-06
2014-07-07
2014-07-08
2014-07-09
2014-07-10
2014-07-11
2014-07-12
2014-07-13
2014-07-14	1		1
2014-07-15		1
2014-07-16
2014-07-17
2014-07-18
2014-07-19		1
2014-07-20						1
2014-07-21
2014-07-22
2014-07-23						1
2014-07-24
2014-07-25
2014-07-26
2014-07-27
2014-07-28
2014-07-29
2014-07-30
2014-07-31
2014-08-01
2014-08-02					1
2014-08-03
2014-08-04
2014-08-05		1
2014-08-06
2014-08-07
2014-08-08
2014-08-09
2014-08-10
2014-08-11
2014-08-12
2014-08-13
2014-08-14					1
2014-08-15
2014-08-16
2014-08-17
2014-08-18
2014-08-19
2014-08-20
2014-08-21								1
2014-08-22
2014-08-23
2014-08-24
2014-08-25
2014-08-26
2014-08-27					1
2014-08-28
2014-08-29
2014-08-30
2014-08-31
2014-09-01
2014-09-02
2014-09-03
2014-09-04
2014-09-05
2014-09-06
2014-09-07
2014-09-08
2014-09-09
2014-09-10
2014-09-11
2014-09-12
2014-09-13
2014-09-14
2014-09-15
2014-09-16
2014-09-17
2014-09-18
2014-09-19
2014-09-20
2014-09-21
2014-09-22
2014-09-23
2014-09-24
2014-09-25
2014-09-26
2014-09-27
2014-09-28
2014-09-29
2014-09-30
2014-10-01
2014-10-02
2014-10-03
2014-10-04
2014-10-05
2014-10-06
2014-10-07
2014-10-08
2014-10-09							1	1
2014-10-10
2014-10-11
2014-10-12
2014-10-13
2014-10-14
2014-10-15
2014-10-16
2014-10-17
2014-10-18
2014-10-19
2014-10-20
2014-10-21
2014-10-22
2014-10-23
2014-10-24
2014-10-25								1
2014-10-26
2014-10-27
2014-10-28
2014-10-29
2014-10-30
2014-10-31
2014-11-01
2014-11-02
2014-11-03
2014-11-04
2014-11-05
2014-11-06
2014-11-07
2014-11-08
2014-11-09
2014-11-10
2014-11-11
2014-11-12								1
2014-11-13
2014-11-14
2014-11-15
2014-11-16
2014-11-17
2014-11-18
2014-11-19
2014-11-20								1
2014-11-21
2014-11-22
2014-11-23
2014-11-24
2014-11-25
2014-11-26
2014-11-27
